# Supplementary material for: TransCom model simulations of CH 4 and related species: linking transport, surface flux and chemical loss with CH 4 variability in the troposphere and lower stratosphere
Source: Copernicus journal article supplement (doi:10.5194/acp-11-12813-2011), 2011-12-19
Supplement: Supplementary file 1 [file acp-11-12813-2011-supplement.pdf]

## Supplementary information of “TransCom model simulations of CH<sub>4</sub> and related species: Linking transport, surface flux and chemical loss with CH<sub>4</sub> variability in troposphere and lower stratosphere”

**Table S1:** List of responsible scientists and e-mail addresses for different chemistry-transport model simulations.

| <b>Model Name</b> | <b>Institution</b>                                                    | <b>Modeler Name</b>                                                                                             |
|-------------------|-----------------------------------------------------------------------|-----------------------------------------------------------------------------------------------------------------|
| ACCESS            | CSIRO Marine and Atmospheric Research, Australia                      | K. D. Corbin <kdcorbin@atmos.colostate.edu >, R. M. Law <Rachel.Law@csiro.au>                                   |
| ACTM              | Research Institute for Global Change, Japan                           | R. Saito <rsaito@jamstec.go.jp>, A. Ito <itoh@nies.go.jp>, P. K. Patra <prabir@jamstec.go.jp>                   |
| CAM-Chem          | Cornell University, USA                                               | L. Meng <meng2000@gmail.com>, P. G. Hess <pgh25@cornell.edu>                                                    |
| CCAM              | CSIRO Marine and Atmospheric Research, Australia                      | Z. Loh <Zoe.Loh@csiro.au>, R. M. Law <Rachel.Law@csiro.au>                                                      |
| GEOS-Chem         | University of Edinburg, UK                                            | A. Fraser <ac.fraser@ed.ac.uk>, P. I. Palmer <pip@ed.ac.uk>                                                     |
| IMPACT            | Lawrence Livermore National Laboratory, USA                           | D. Bergmann <Bergmann1@llnl.gov>, P. Cameron-Smith <pjc@llnl.gov>                                               |
| LMDZ              | Institut Pierre Simon Laplace des sciences de l'environnement, France | A. Fortems-Cheiney <audrey.fortems@lsce.ipsl.fr>, P. Bousquet <bousquet@lsce.ipsl.fr>                           |
| MOZART            | Massachusetts Institute of Technology, USA                            | M. Rigby <mrigby@mit.edu>, R. G. Prinn <rprinn@mit.edu>                                                         |
| NIES08i           | National Institute for Environmental Studies, Japan                   | D. Belikov <dmitry.belikov@nies.go.jp>, S. Maksyutov <shamil@nies.go.jp>                                        |
| PCTM              | NASA Goddard Space Flight Center, USA                                 | H. Bian <huisheng.bian-1@nasa.gov> S. R. Kawa <stephan.r.kawa@nasa.gov>                                         |
| TM5               | SRON Netherlands Institute for Space Research, The Netherlands        | S. Houweling <s.houweling@uu.nl>, M. Krol <M.C.Krol@uu.nl>                                                      |
| TOMCAT            | University of Leeds                                                   | C. Wilson <c.wilson@see.leeds.ac.uk> E. Gloor <E.Gloor@leeds.ac.uk> M. P. Chipperfield <martyn@env.leeds.ac.uk> |

**Table S2:** Details of data sources and responsible organizations for taking measurements of CH<sub>4</sub>, MCF and SF<sub>6</sub> at 8 different baseline monitoring stations under the AGAGE [Cunnold et al., 2002; Prinn et al., 2005] and NOAA [Dlugokencky et al., 1998; Butler et al., 2004] networks.

| <b>Station name &amp; location</b>                 | <b>Data network &amp; managing institution</b>                                                                     |
|----------------------------------------------------|--------------------------------------------------------------------------------------------------------------------|
| ALT, Alert, Canada;<br>62°W, 82°N, 210m            | NOAA: Global Monitoring Division, ESRL<br>(Edward Dlugokencky; James Elkins)                                       |
| BRW, Point Barrow, USA;<br>157°W, 71°N, 11m        | NOAA: Global Monitoring Division, ESRL<br>(Edward Dlugokencky; James Elkins)                                       |
| MHD, Mace Head, Ireland;<br>10°W, 53°N, 25m        | AGAGE: University of Bristol<br>(Simon O'Doherty; Peter Simmonds)                                                  |
| MLO, Mauna Loa, Hawaii, USA;<br>156°W, 20°N, 3397m | NOAA: Global Monitoring Division, ESRL<br>(Edward Dlugokencky; James Elkins)                                       |
| RPB, Ragged Point, Barbados;<br>59°W, 13°N, 45m    | AGAGE: University of California, San<br>Diego (Ray Weiss)                                                          |
| SMO, Samoa, USA;<br>171°W, 14°S, 42m               | AGAGE: University of California, San<br>Diego (Ray Weiss)                                                          |
| CGO, Cape Grim, Australia;<br>145°E, 41°S, 94m     | AGAGE: Commonwealth Scientific and<br>Industrial Research Organization<br>(Paul Fraser, Paul Steele; Paul Krummel) |
| SPO, South Pole, Antarctica;<br>25°W, 90°S, 2810m  | NOAA: Global Monitoring Division, ESRL<br>(Edward Dlugokencky; James Elkins)                                       |

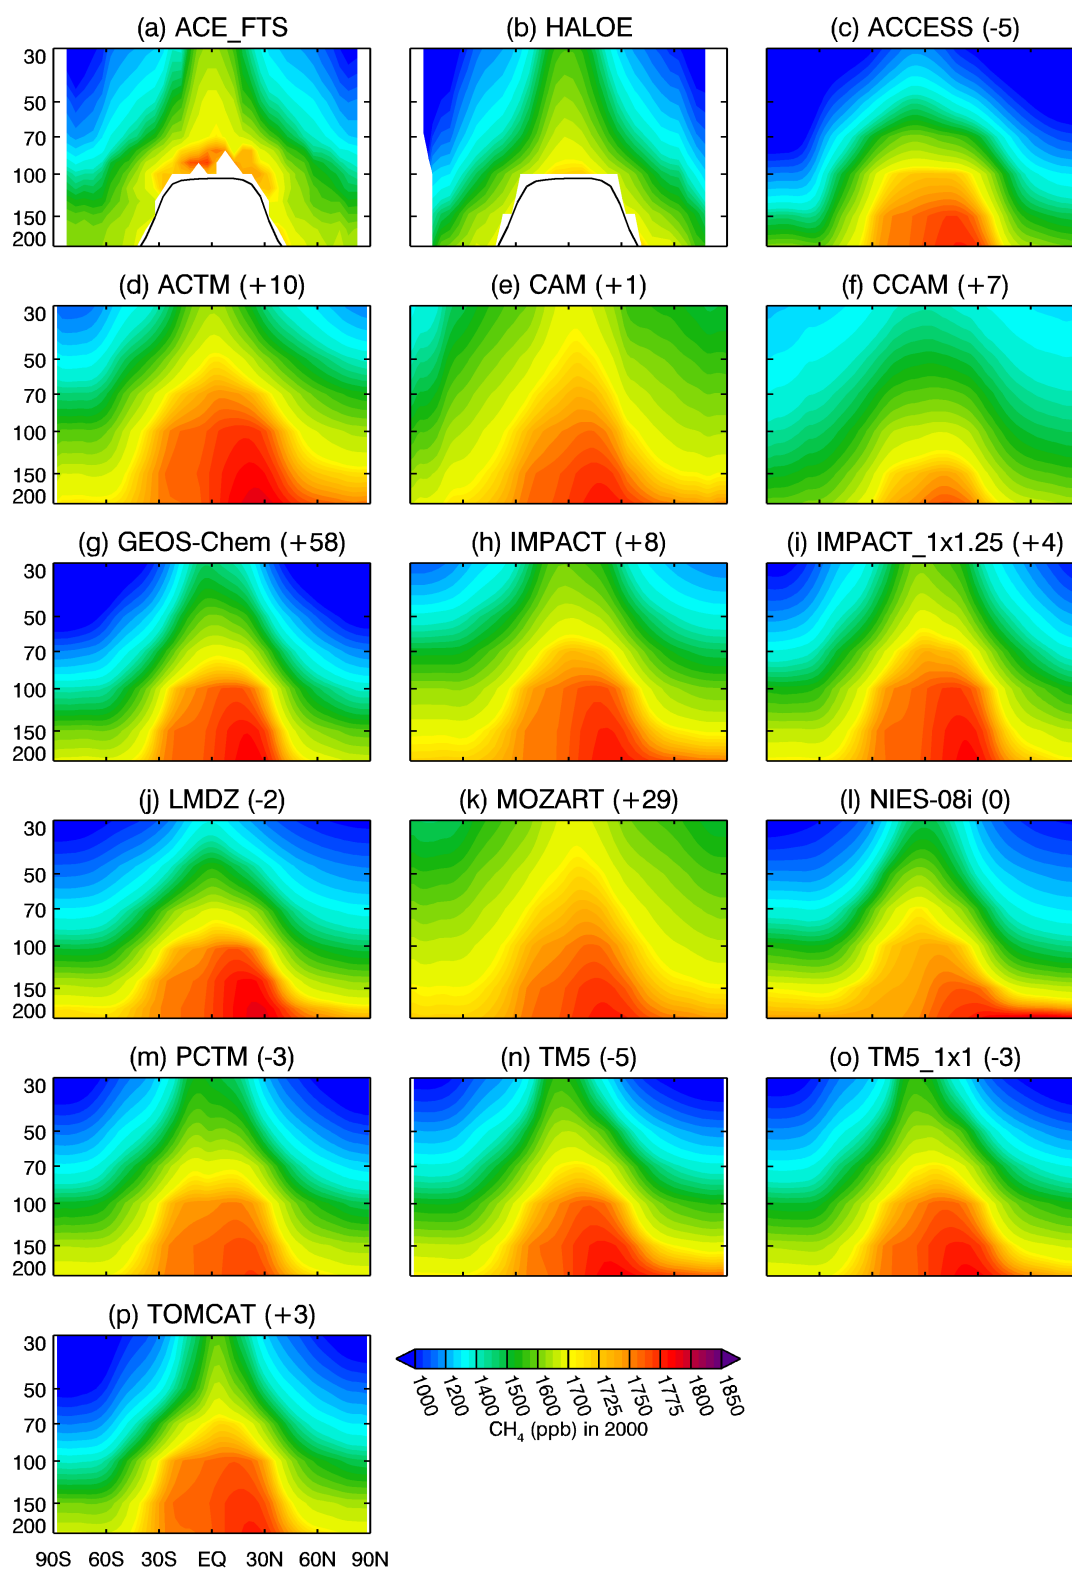

**Figure S1:** Latitude-pressure of ACE-FTS, HALOE/UARS and TransCom simulated CH<sub>4</sub> in the upper troposphere and lower stratosphere. This plot is similar to Fig. 3, but focus is given for the stratospheric altitudes and HALOE observation is include while ACTM\_OH (similar distribution as the ACTM) is not shown.

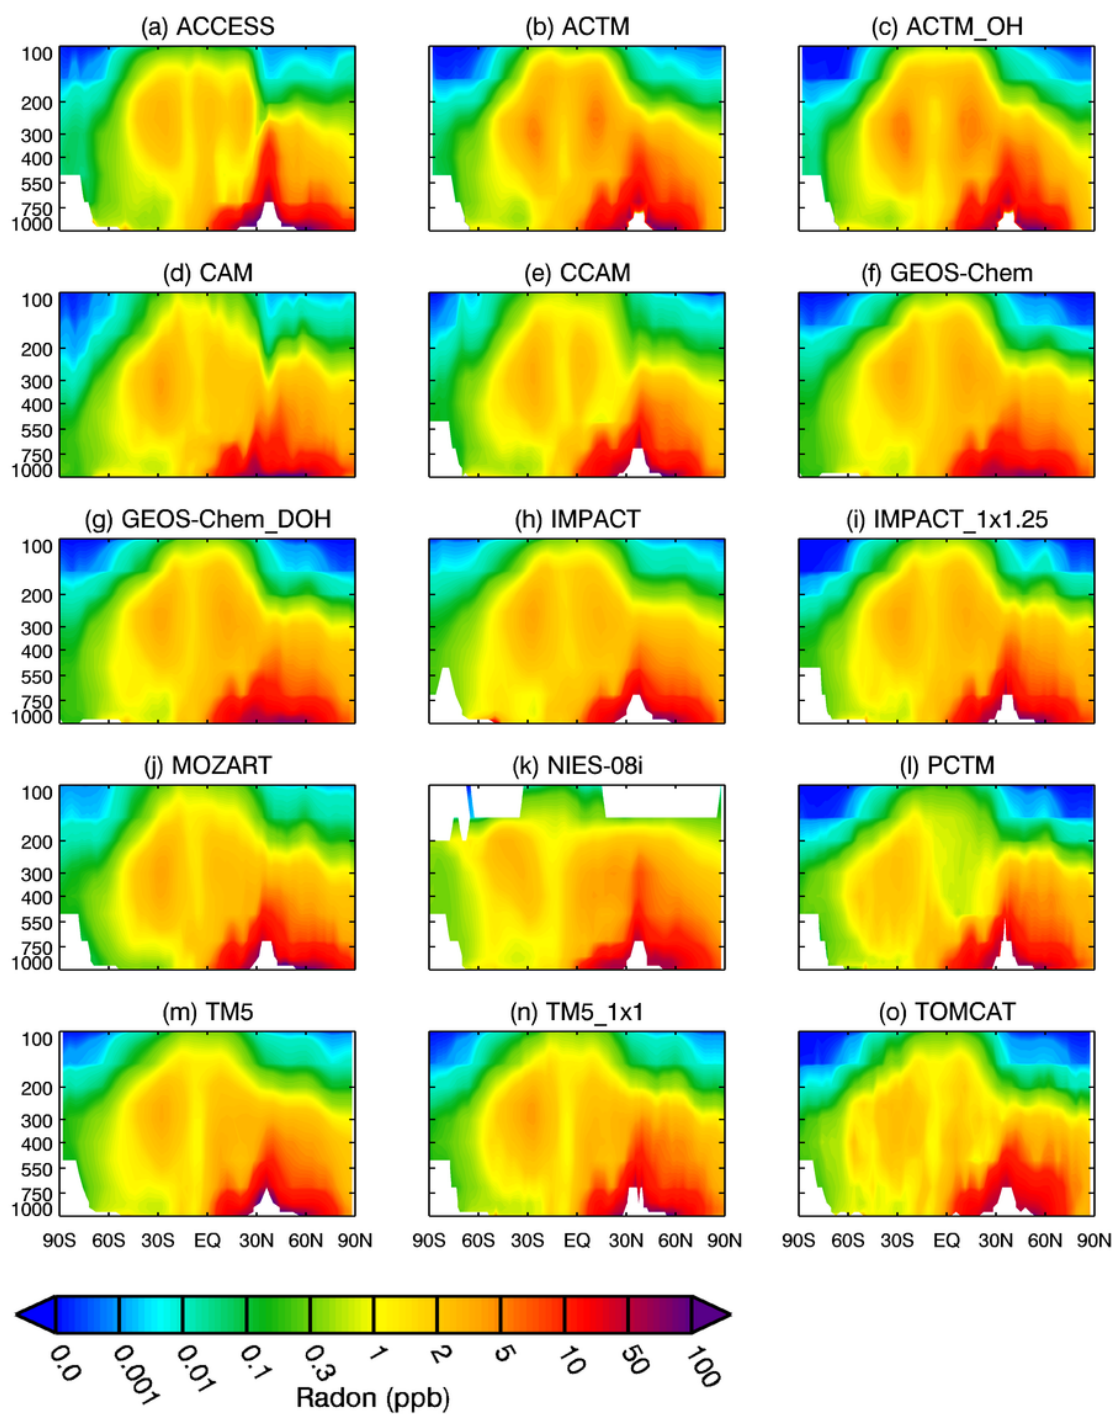

**Figure S2:** Latitude-pressure <sup>222</sup>Rn distribution along the 70°E longitude (South Asian monsoon domain) for the averages during Dec-Jan-Feb (DJF) months of the year 2003-2004. Note the unequal colour bar. LMDZ model did not submit <sup>222</sup>Rn simulation results.

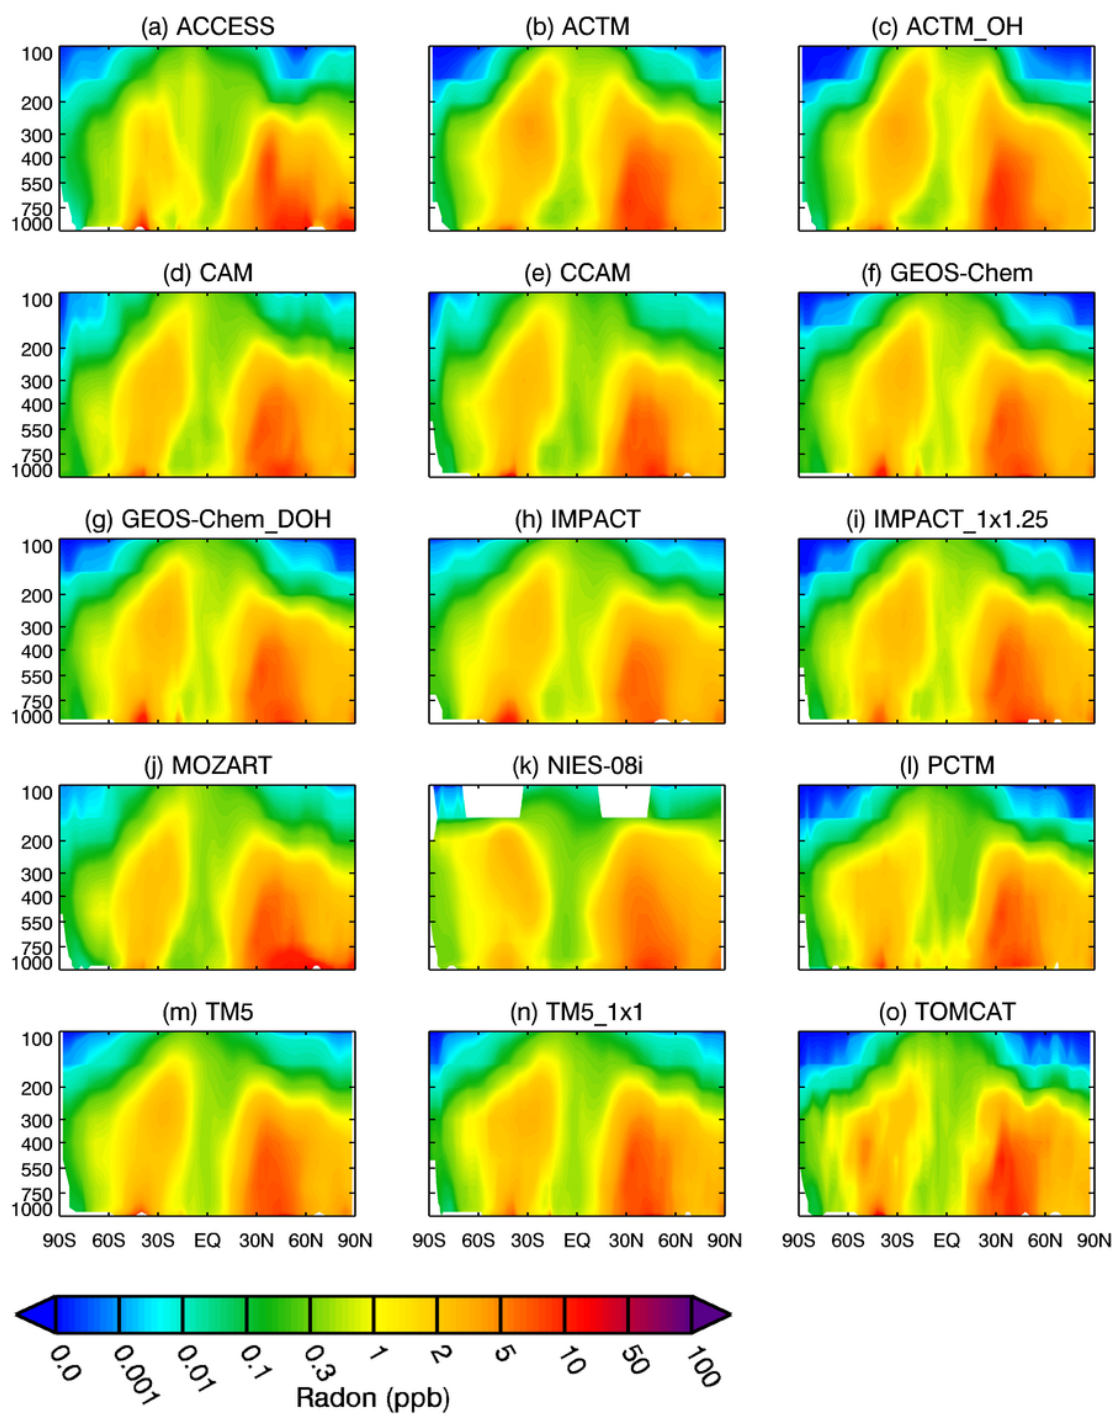

**Figure S3:** Latitude-pressure <sup>222</sup>Rn distribution along the 180°E longitude (over the central Pacific Ocean) for the averages during DJF months of the year 2003-2004.

Note the unequal colour bar.

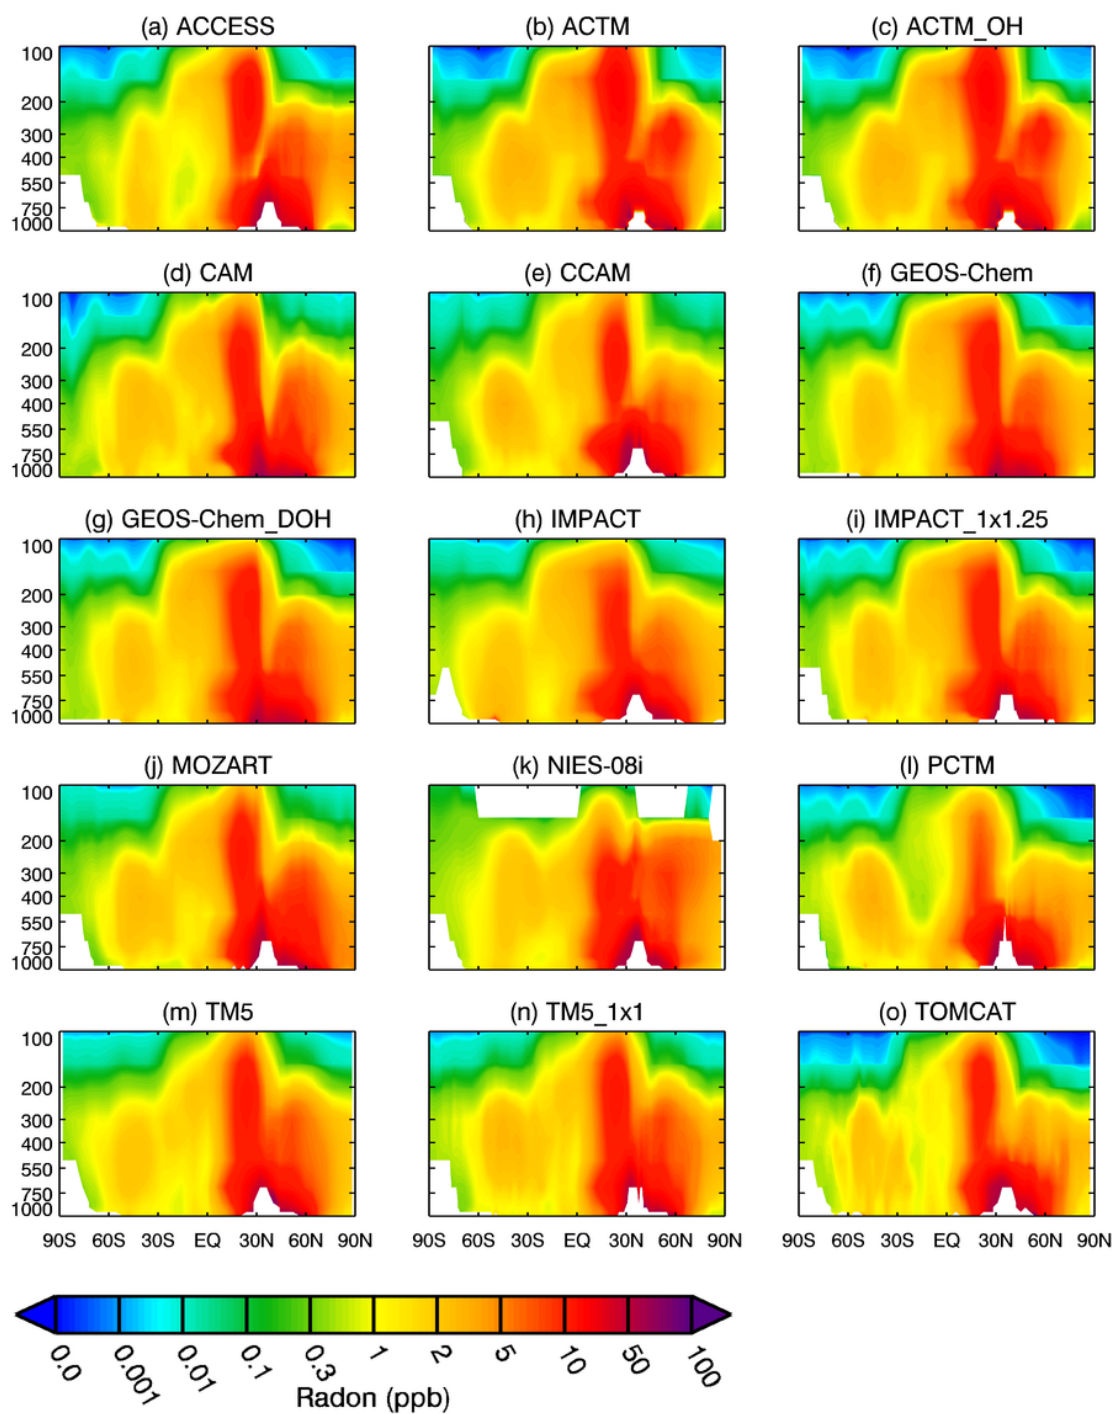

**Figure S4:** Latitude-pressure <sup>222</sup>Rn distribution along the 70°E longitude for the averages during Jun-Jul-Aug (JJA) months of the year 2003. Note the unequal colour bar.

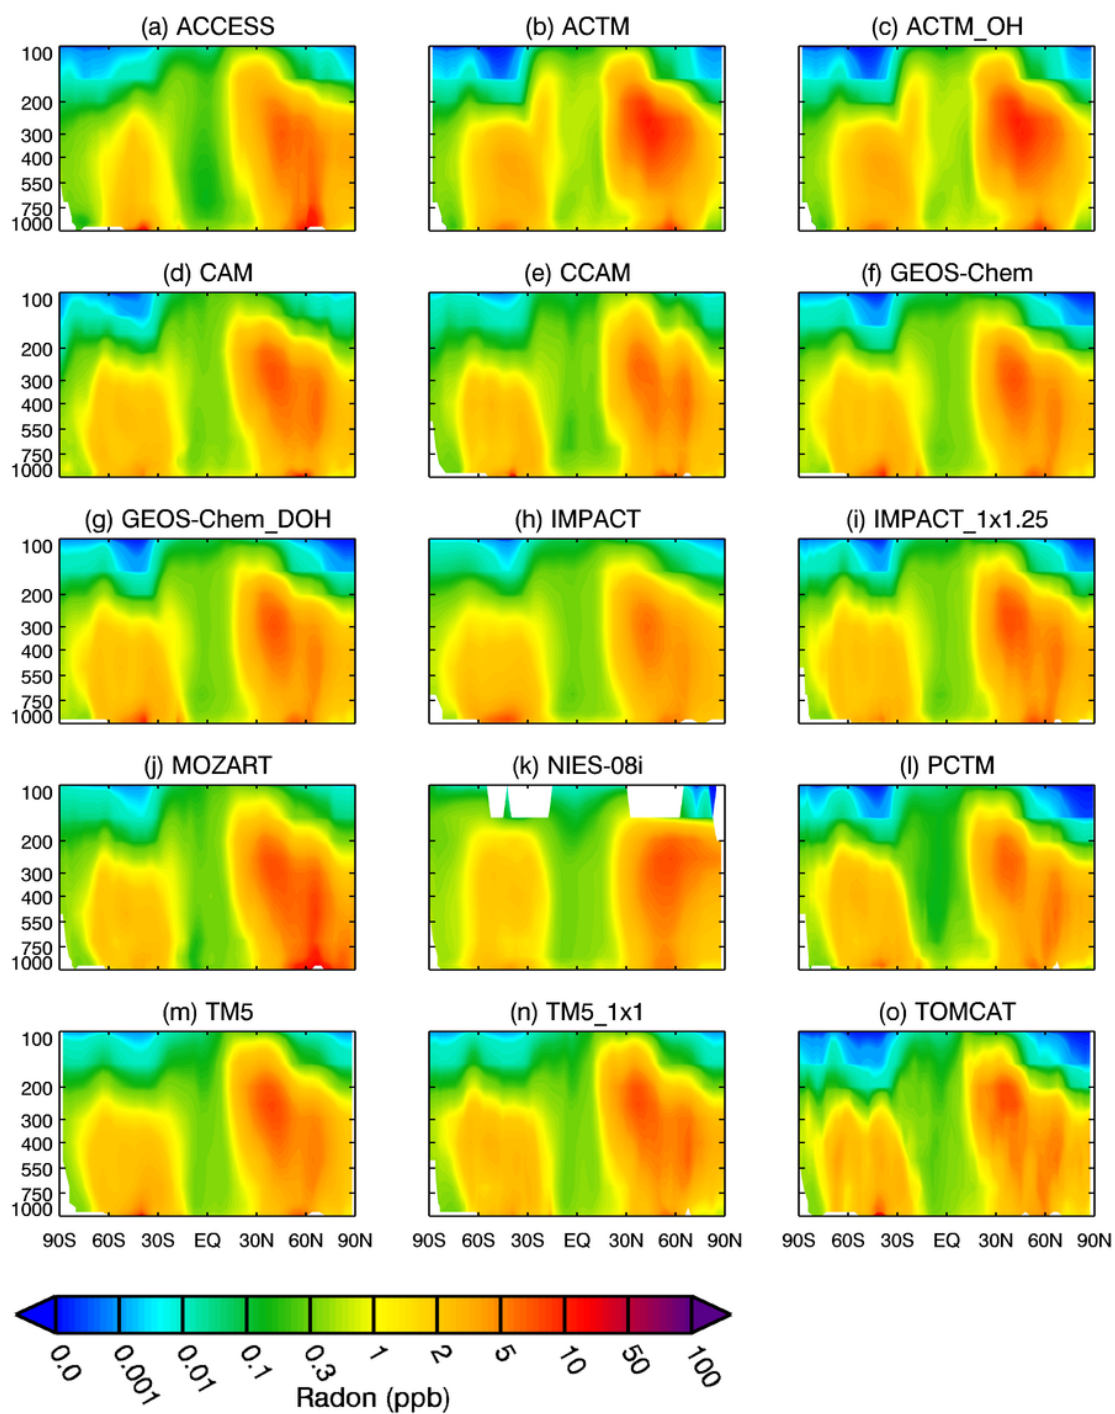

**Figure S5:** Latitude-pressure <sup>222</sup>Rn distribution along the 180°E longitude for the averages during JJA months of the year 2003. Note the unequal colour bar.

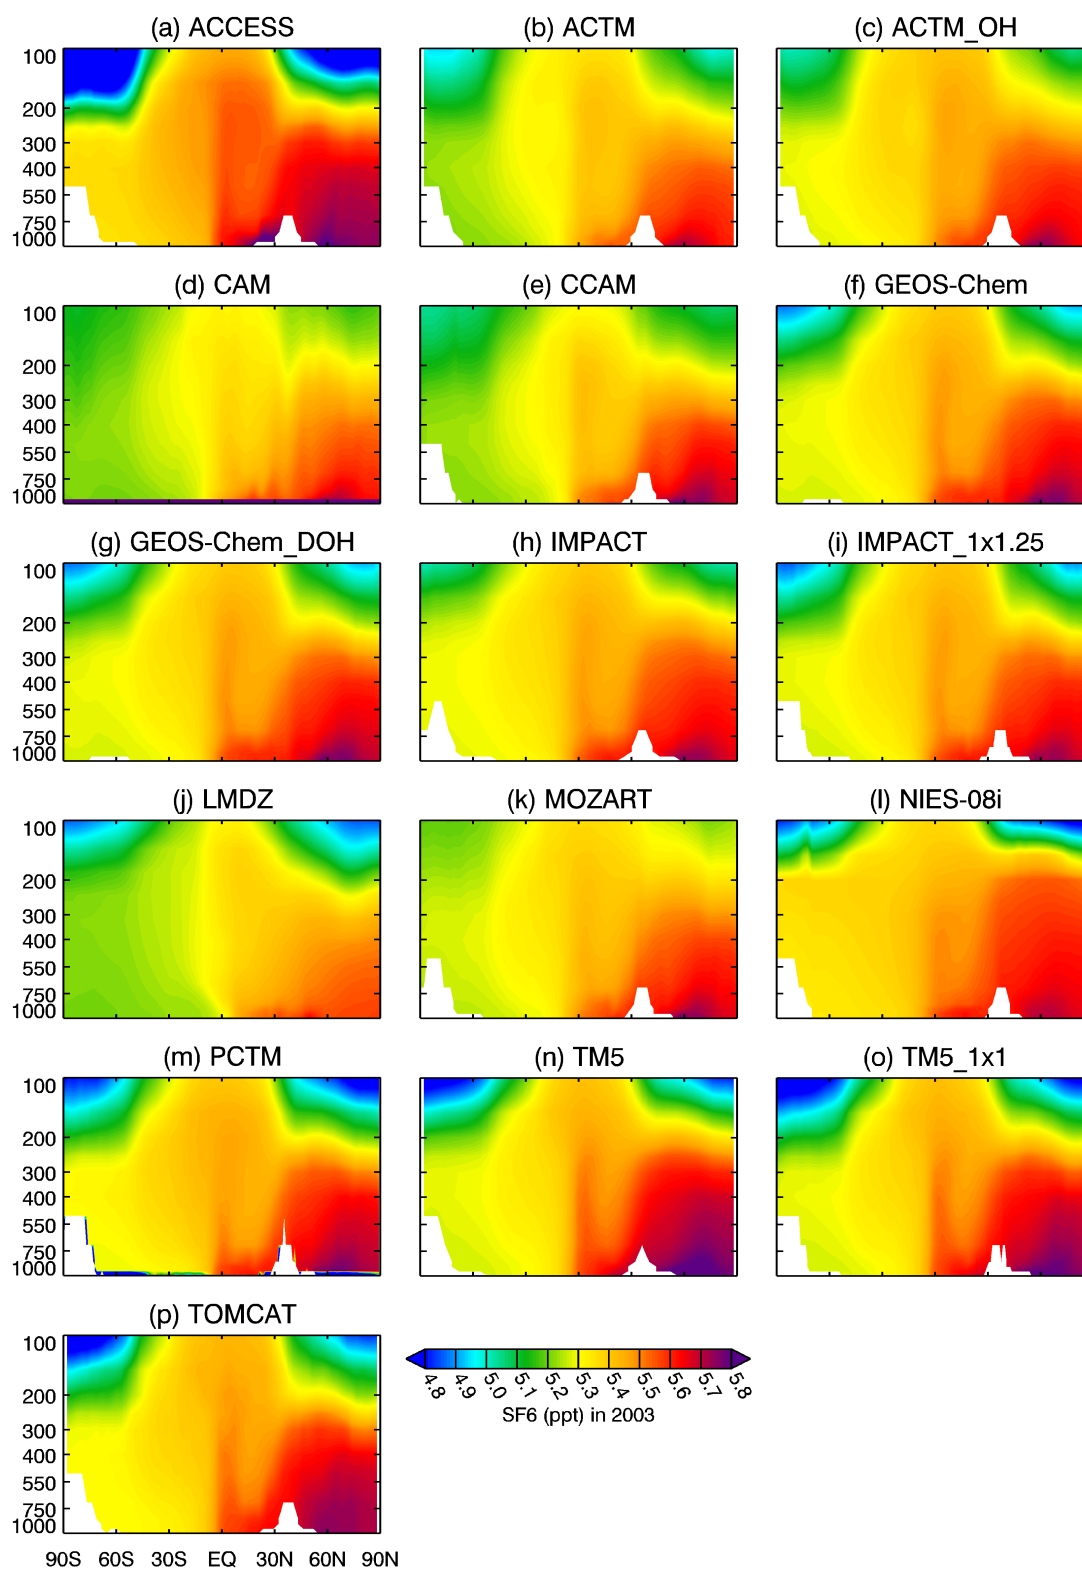

**Figure S6:** Latitude-pressure SF<sub>6</sub> distribution along the 70°E longitude for the averages during DJF months of the year 2003-2004.



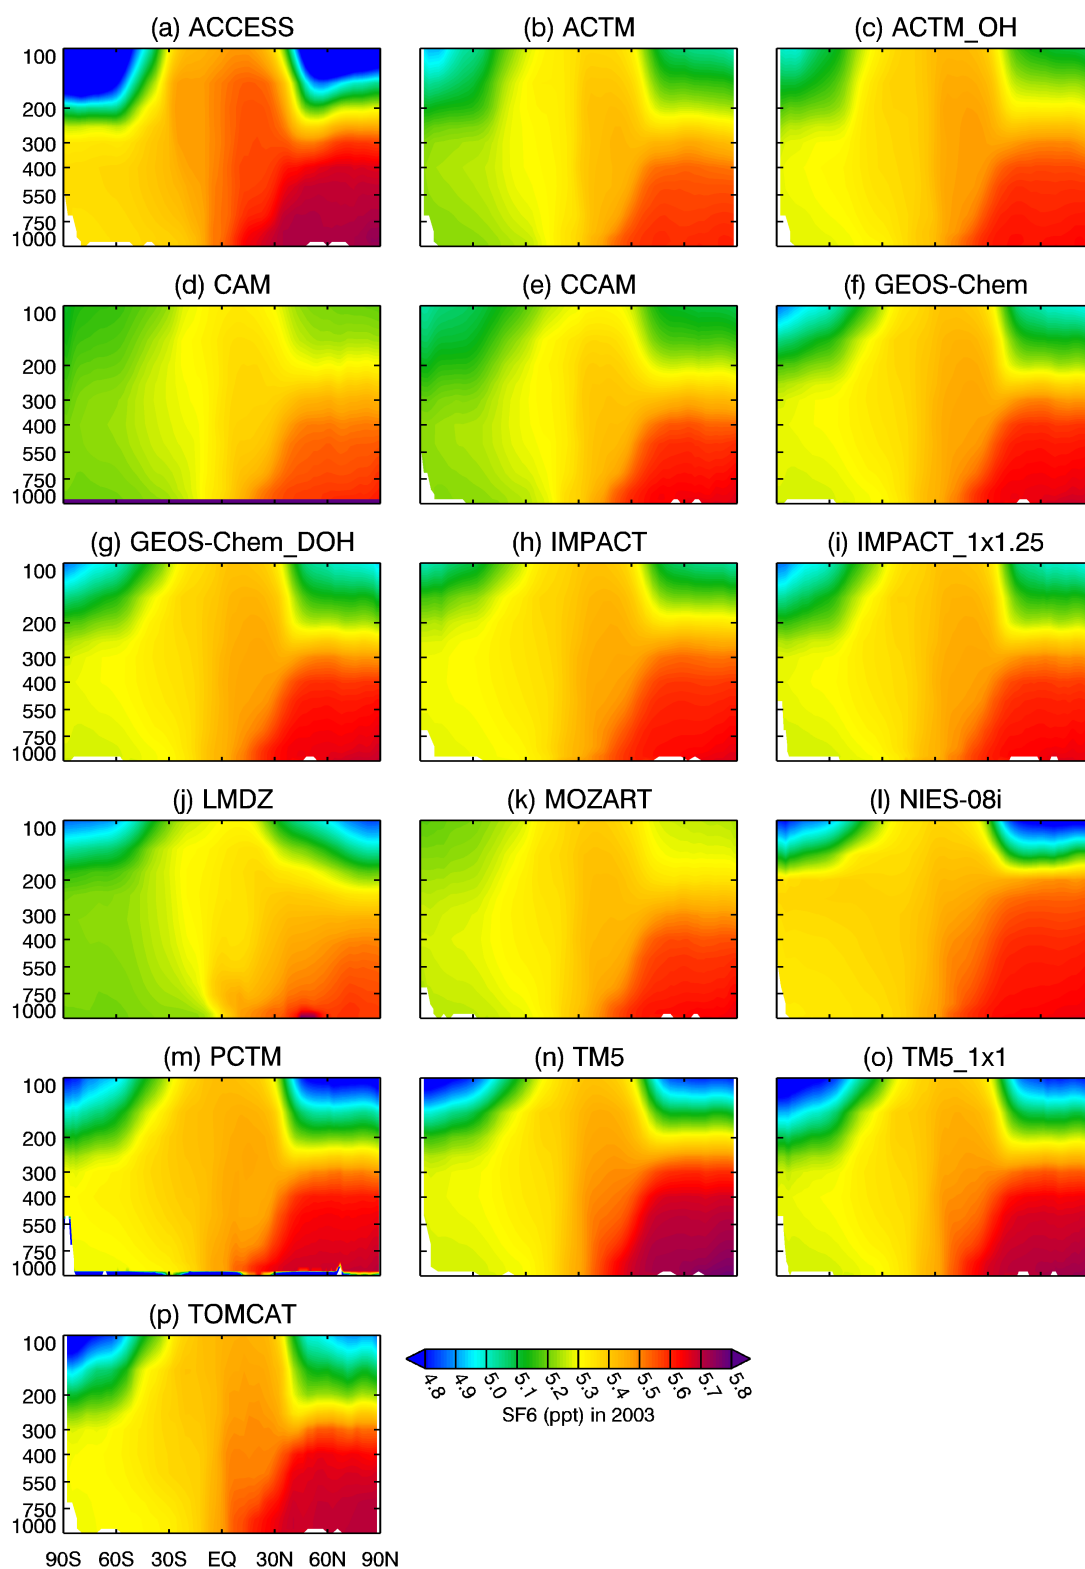

**Figure S7:** Latitude-pressure SF<sub>6</sub> distribution along the 180°E longitude for the averages during DJF months of the year 2003-2004.

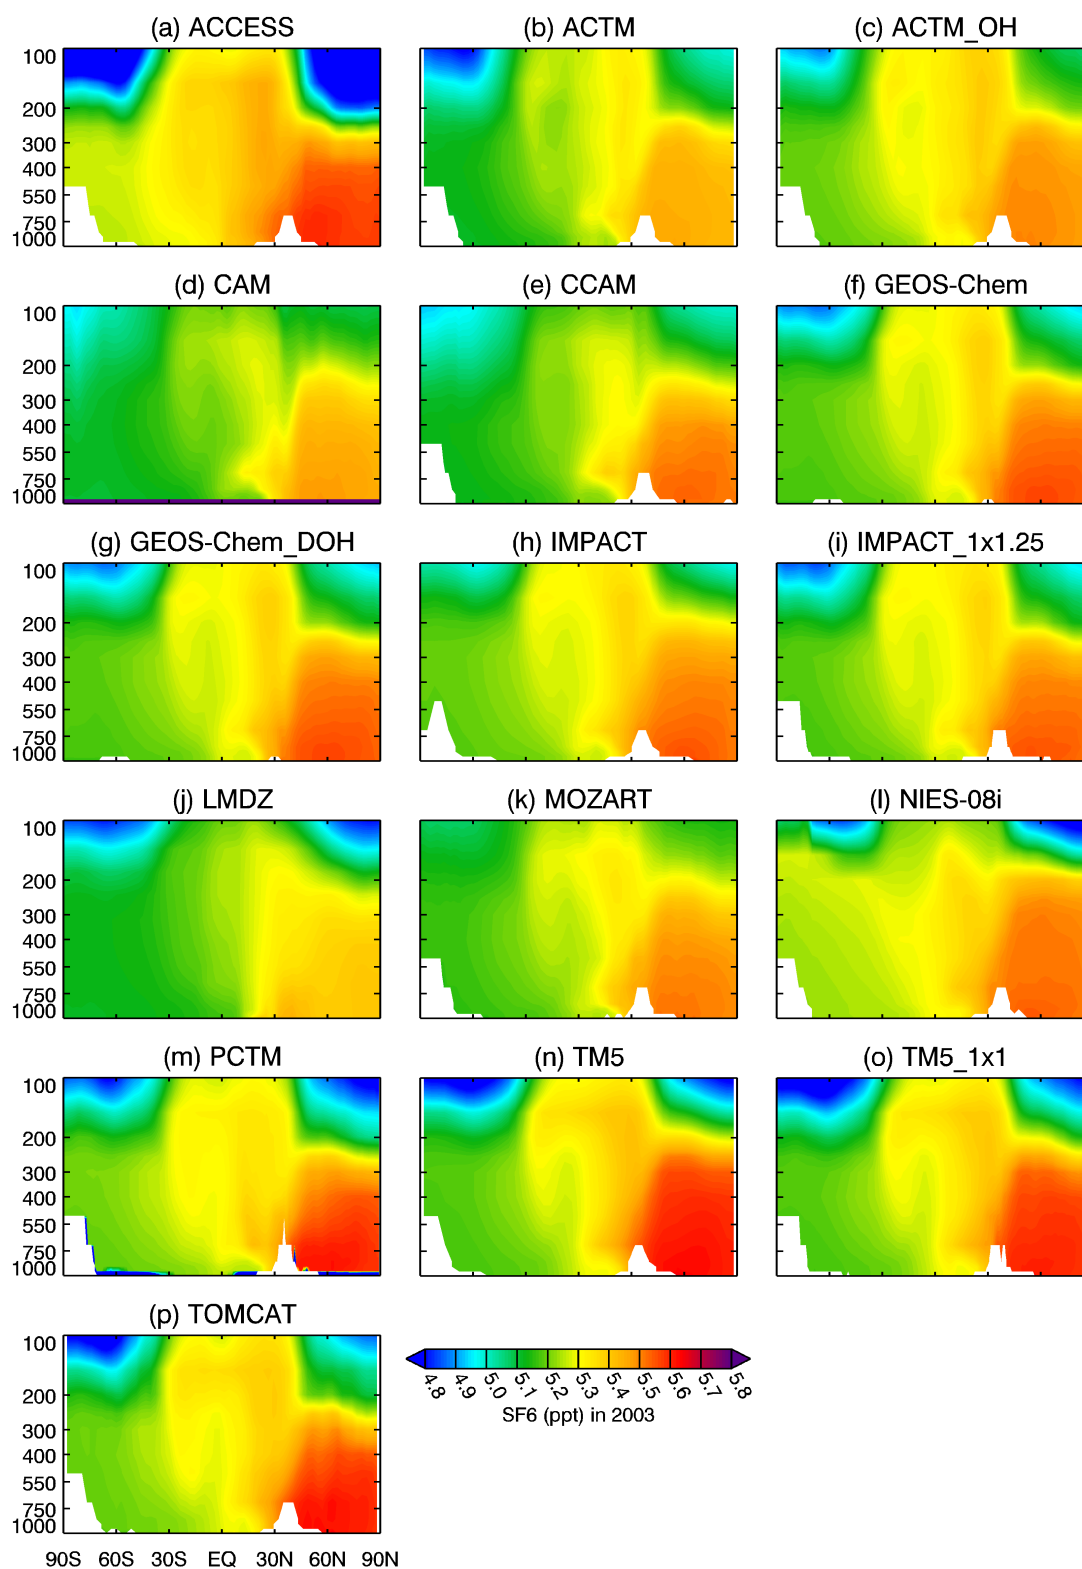

**Figure S8:** Latitude-pressure SF<sub>6</sub> distribution along the 70°E longitude for the averages during JJA months of the year 2003.

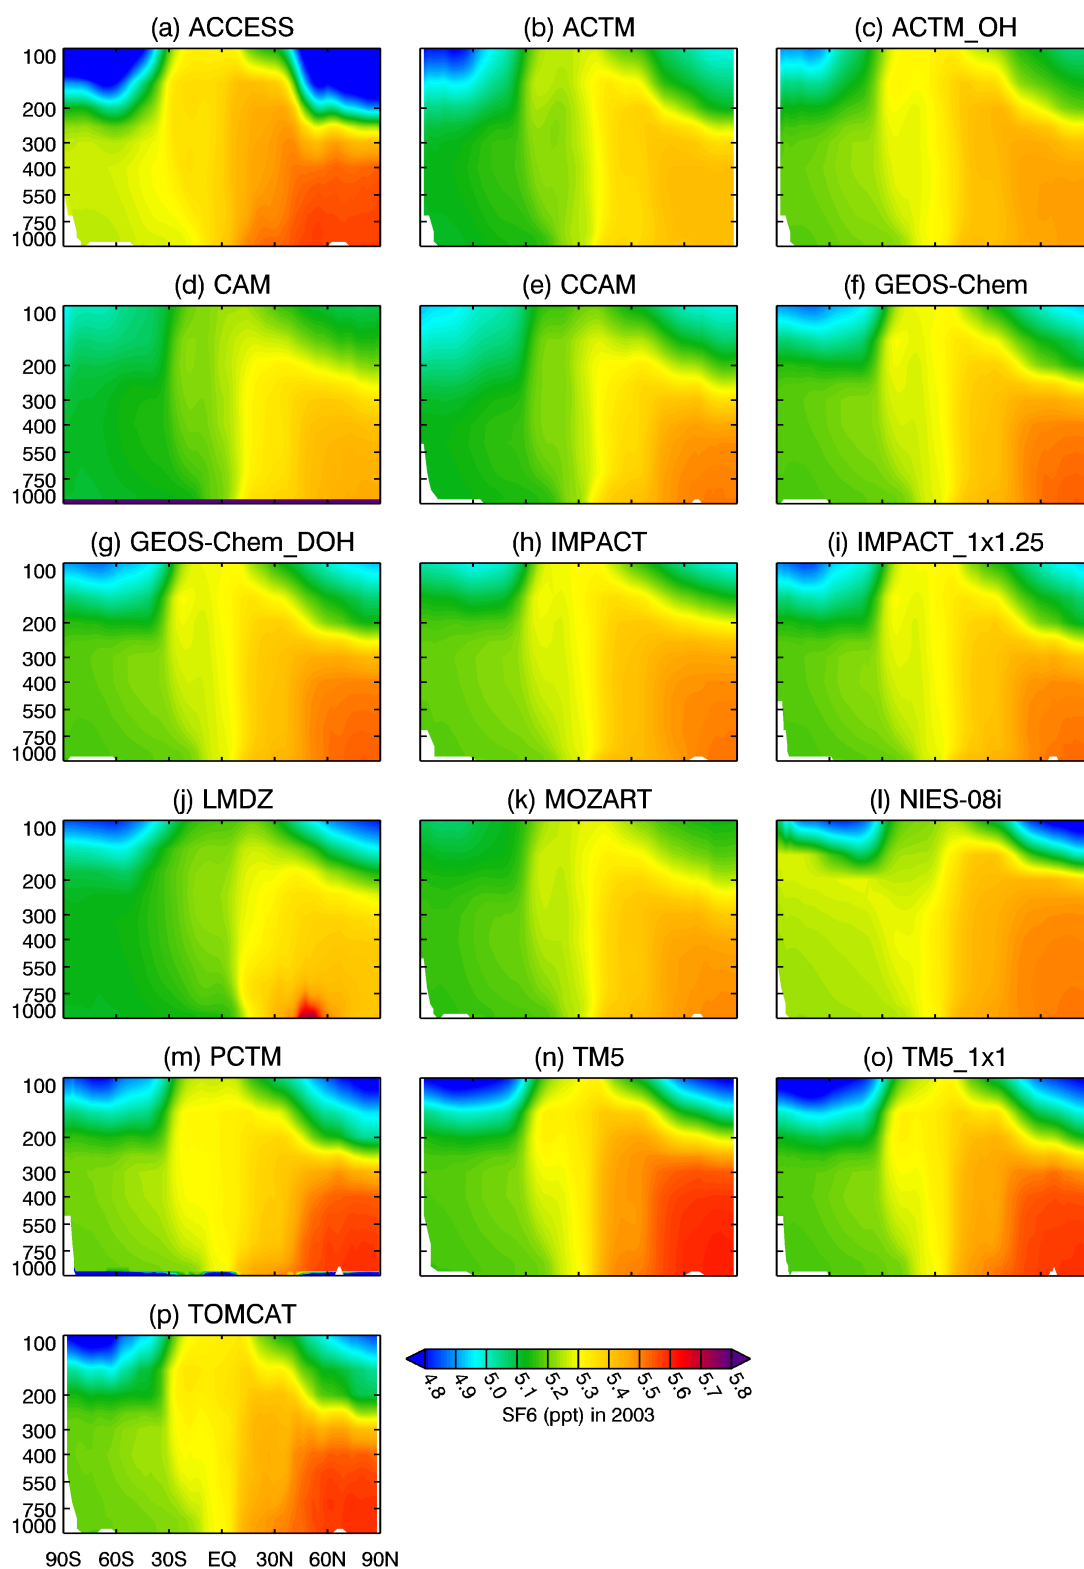

**Figure S9:** Latitude-pressure SF<sub>6</sub> distribution along the 180°E longitude for the averages during JJA months of the year 2003.

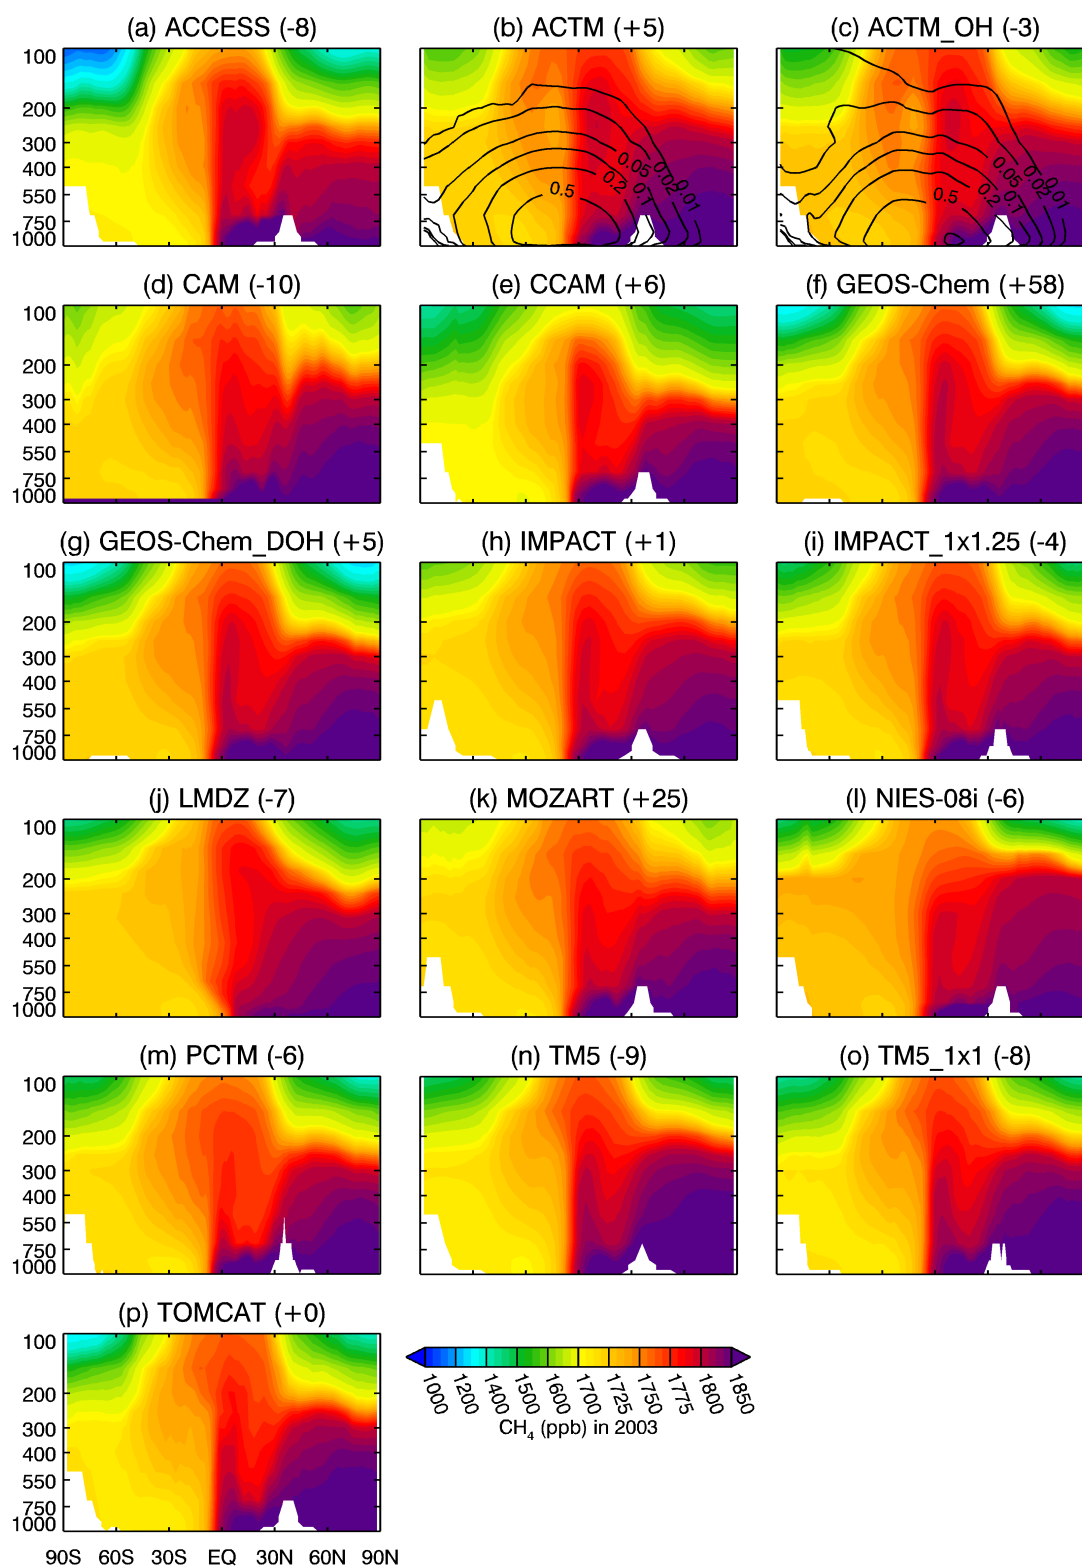

**Figure S10:** Latitude-pressure CH<sub>4</sub> distribution along the 70°E longitude for the averages during DJF months of the year 2003-2004. Note the unequal colour bar.

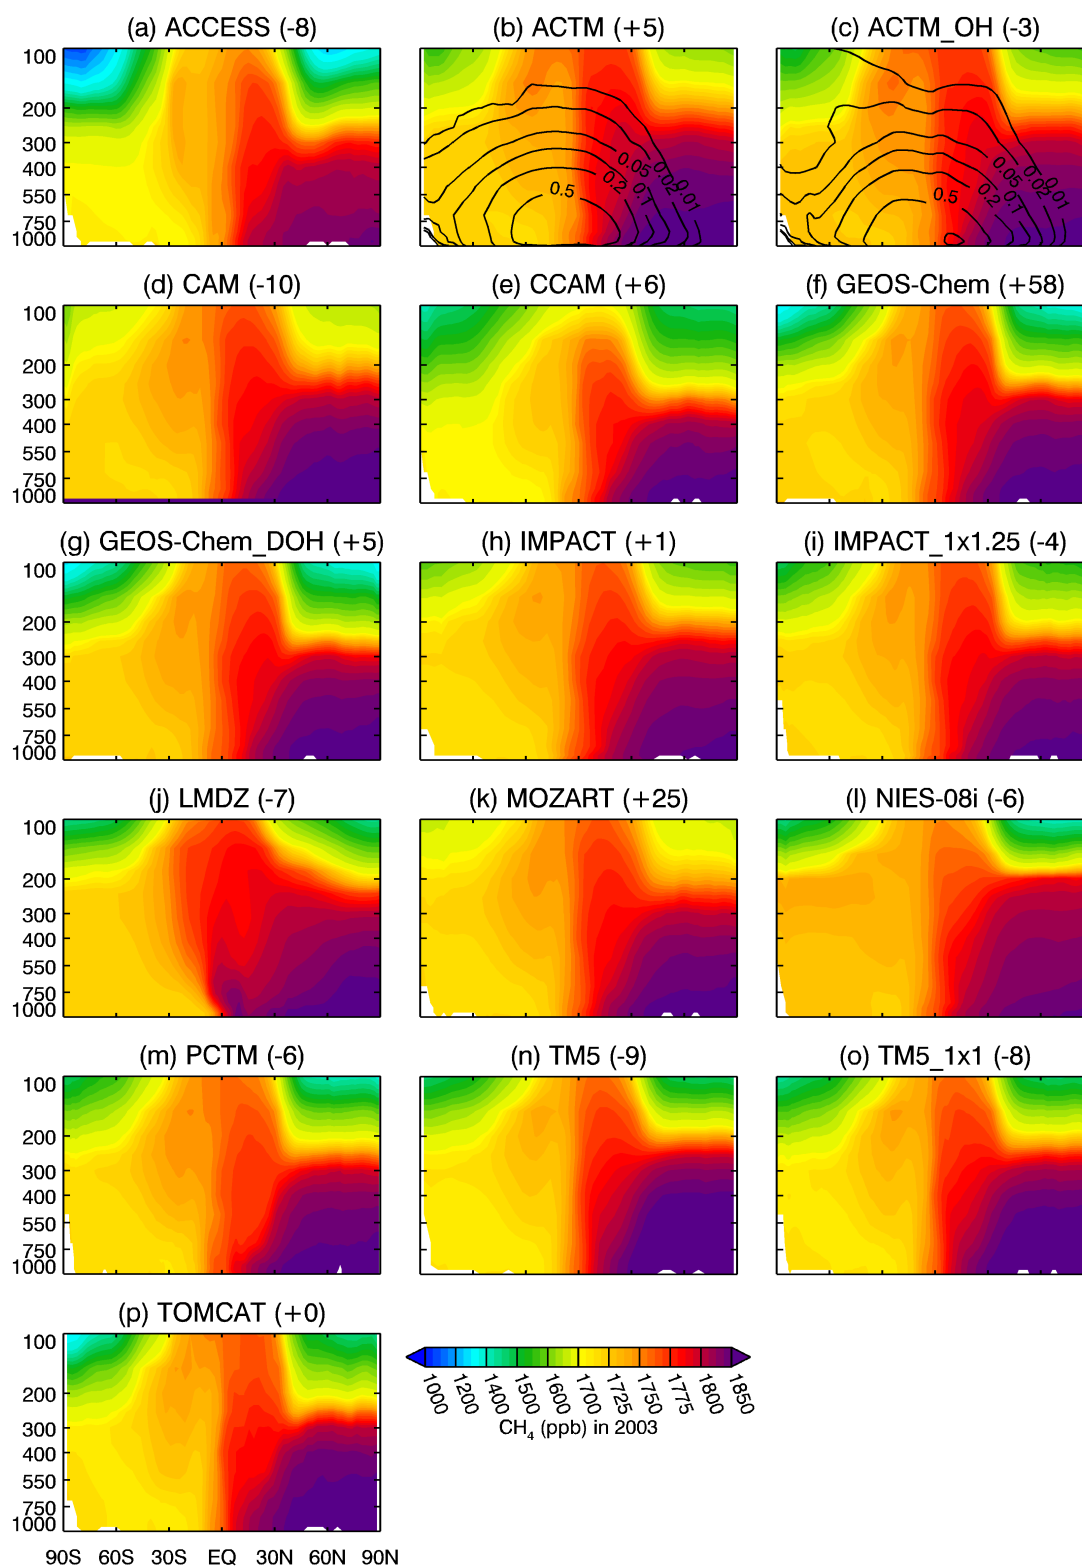

**Figure S11:** Latitude-pressure CH<sub>4</sub> distribution along the 180°E longitude for the averages during DJF months of the year 2003-2004. Note the unequal colour bar.

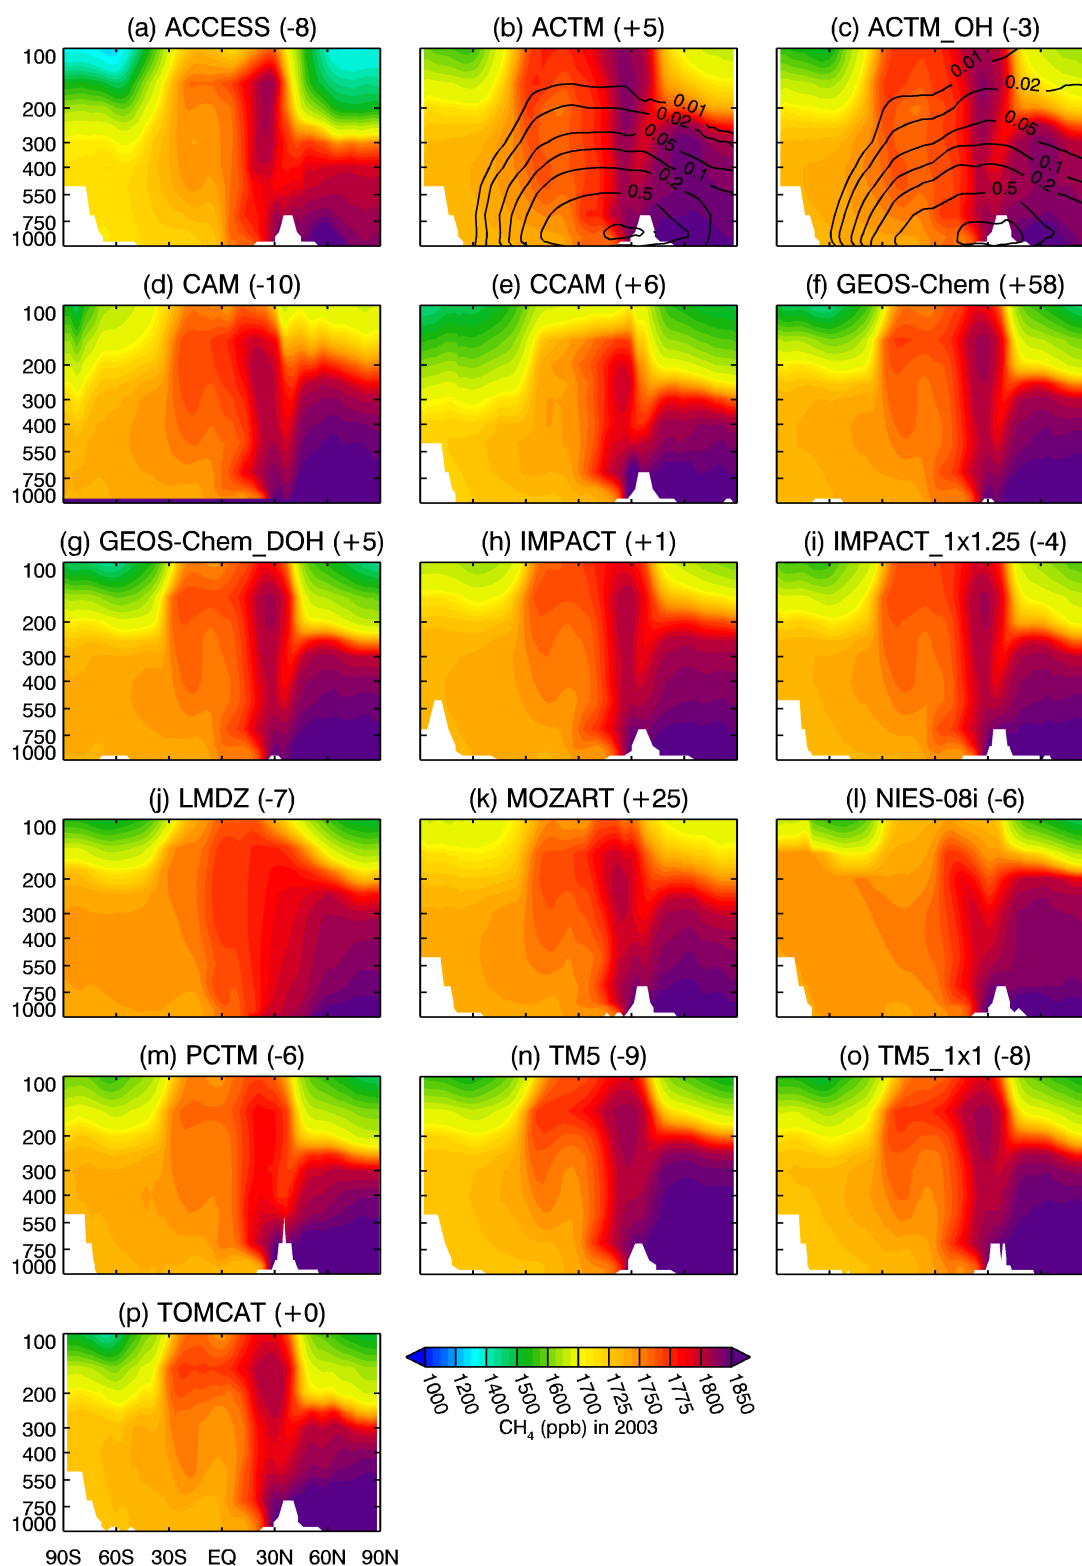

**Figure S12:** Latitude-pressure CH<sub>4</sub> distribution along the 70°E longitude for the averages during JJA months of the year 2003. Note the unequal colour bar.

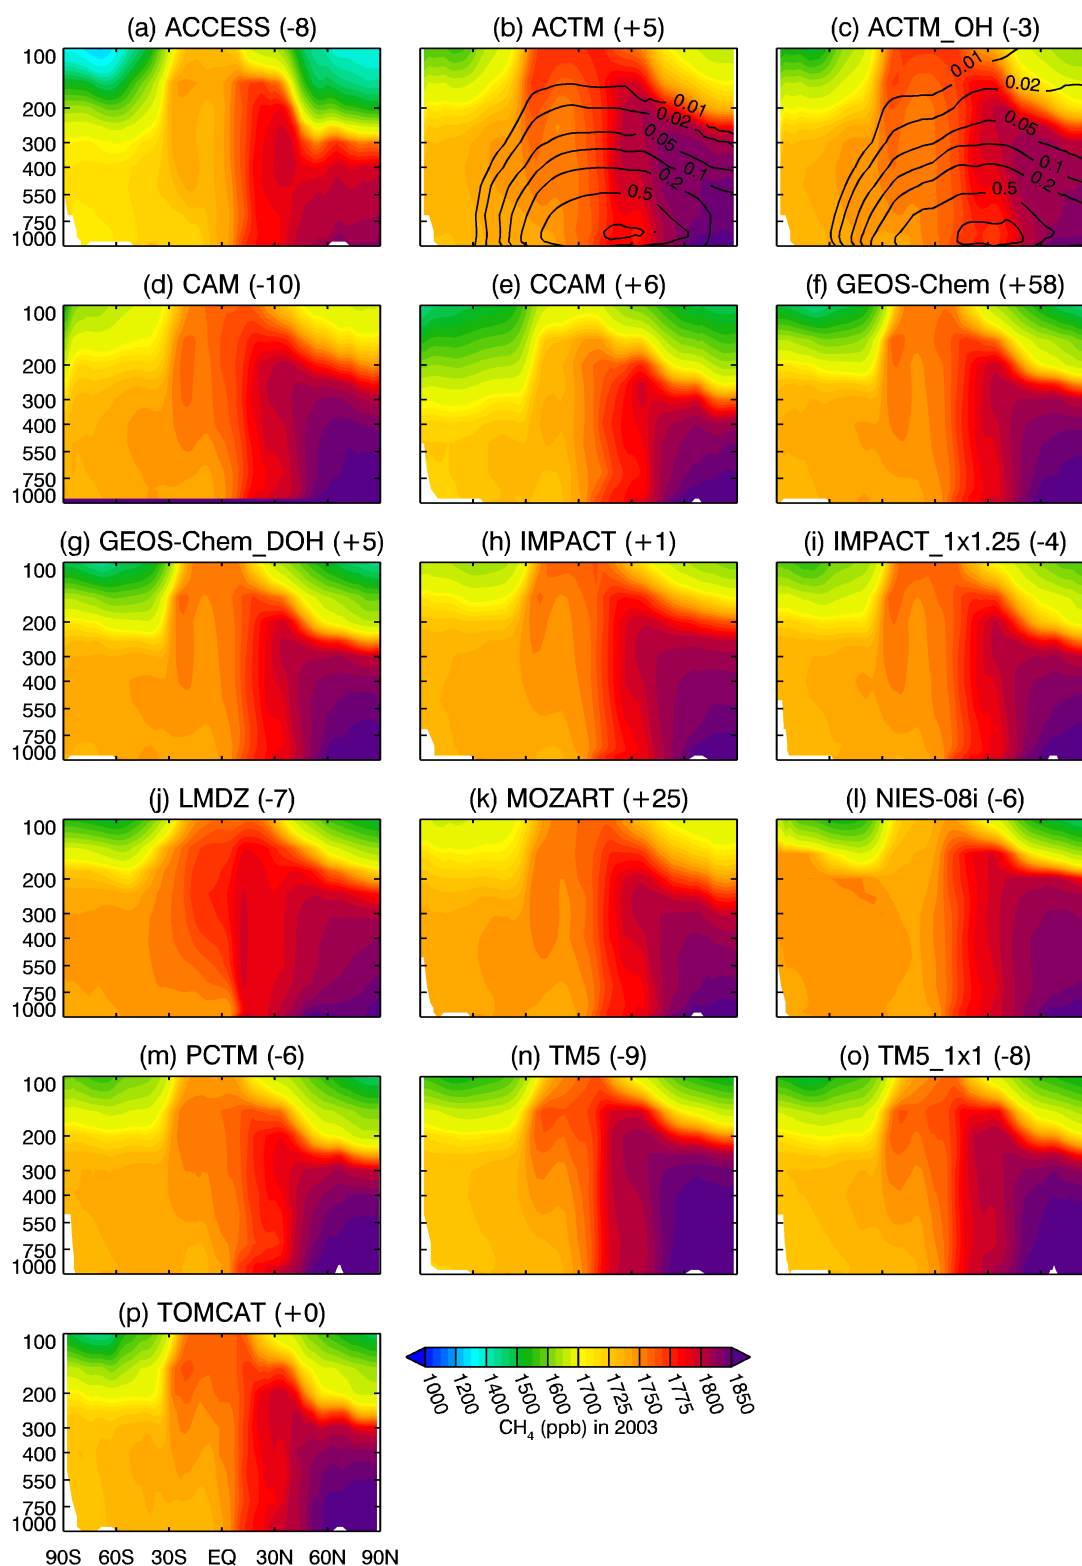

**Figure S13:** Latitude-pressure CH<sub>4</sub> distribution along the 180°E longitude for the averages during JJA months of the year 2003. Note the unequal colour bar.

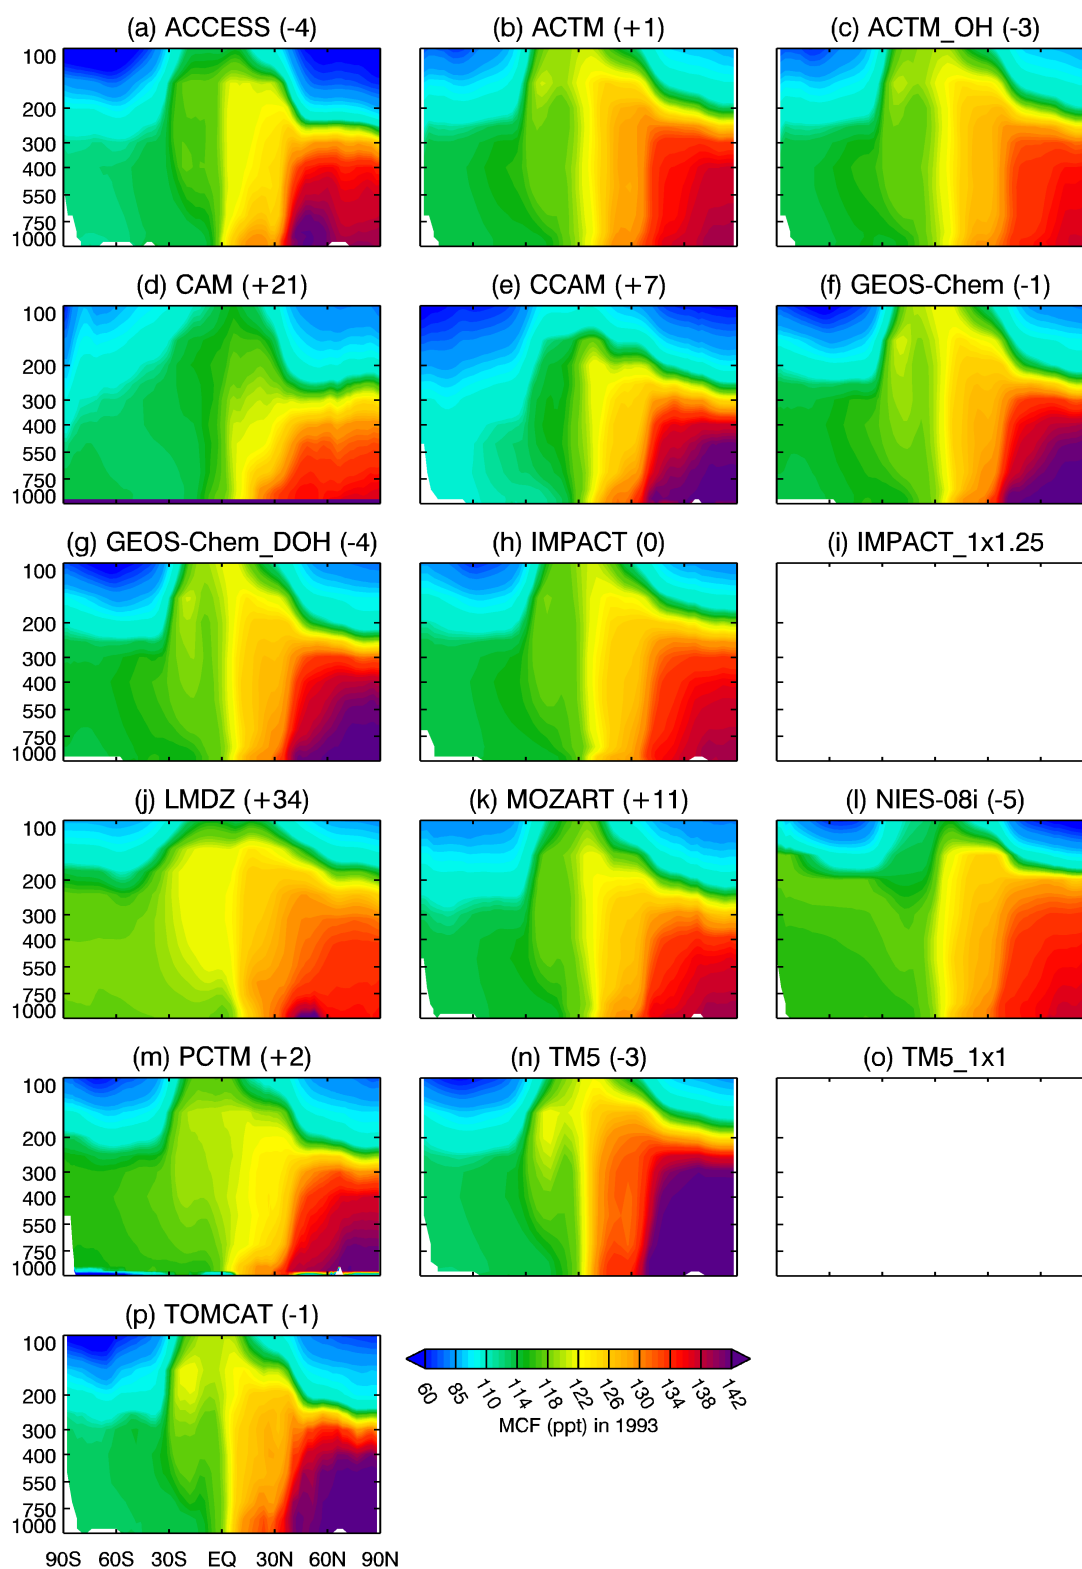

**Figure S14:** Latitude-pressure CH<sub>3</sub>CCl<sub>3</sub> distribution along the 180°E longitude for the averages during JJA months of the year 1993. Note the unequal colour bar.



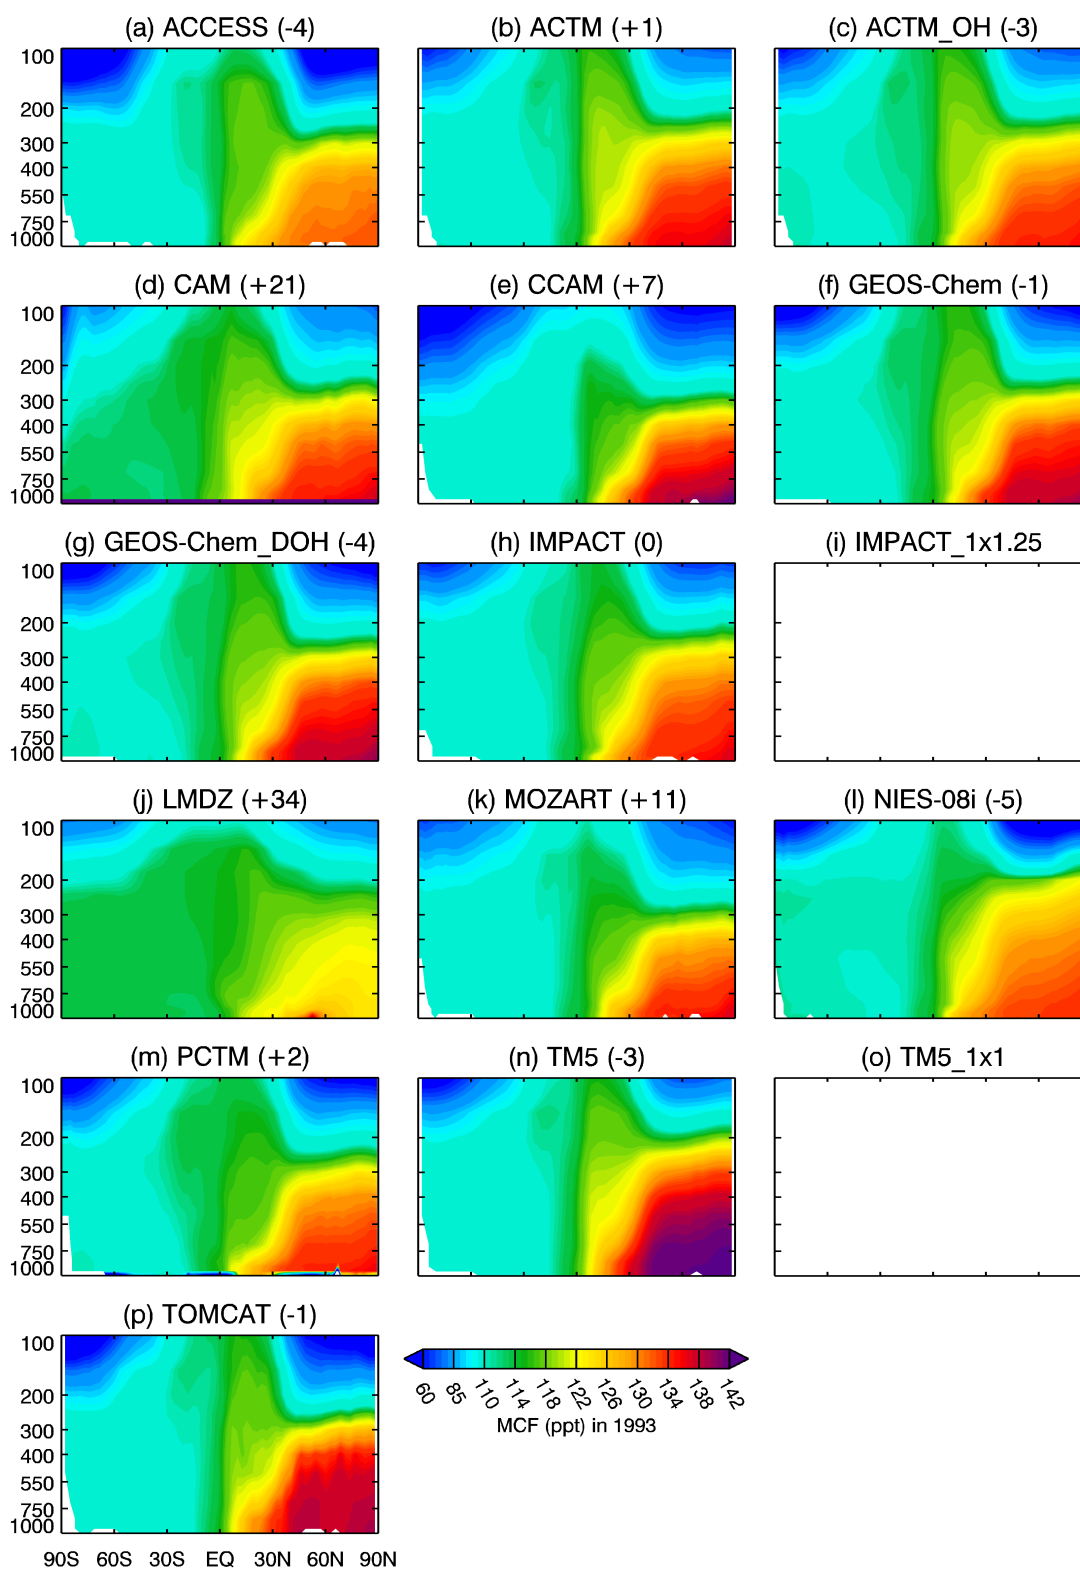

**Figure S15:** Latitude-pressure CH<sub>3</sub>CCl<sub>3</sub> distribution along the 180°E longitude for the averages during DJF months of the year 1993-1994. Note the unequal colour bar.

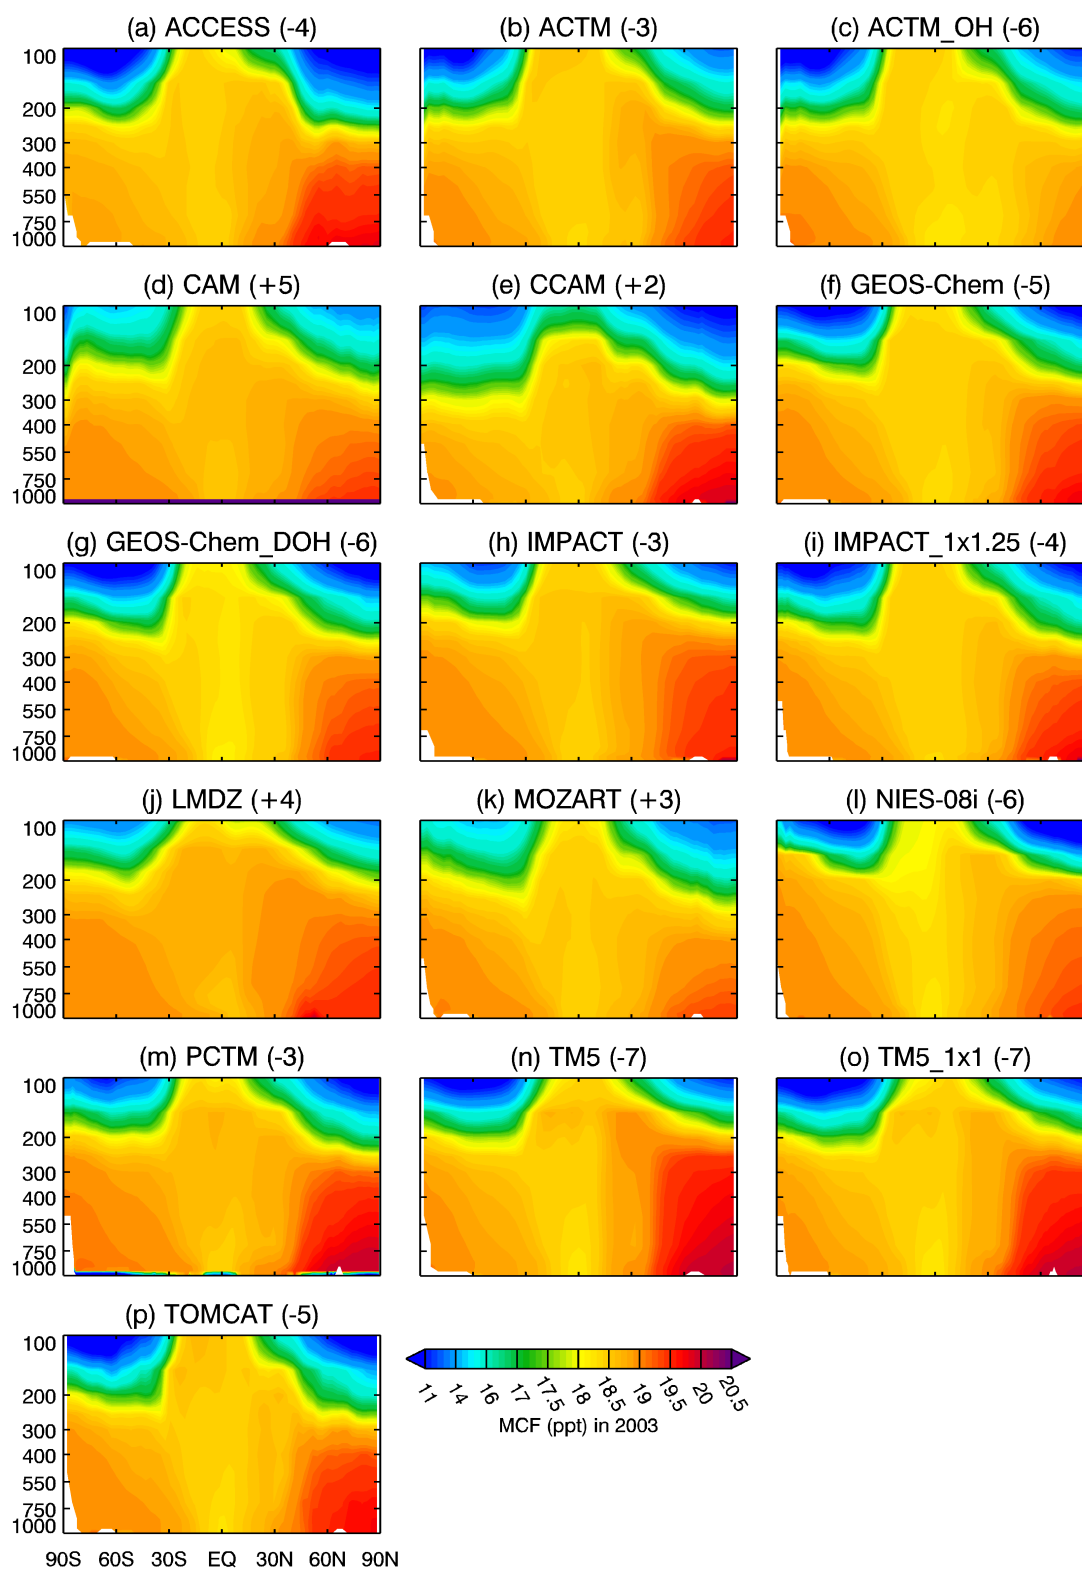

**Figure S16:** Latitude-pressure CH<sub>3</sub>CCl<sub>3</sub> distribution along the 180°E longitude for the averages during JJA months of the year 2003. Note the unequal colour bar.

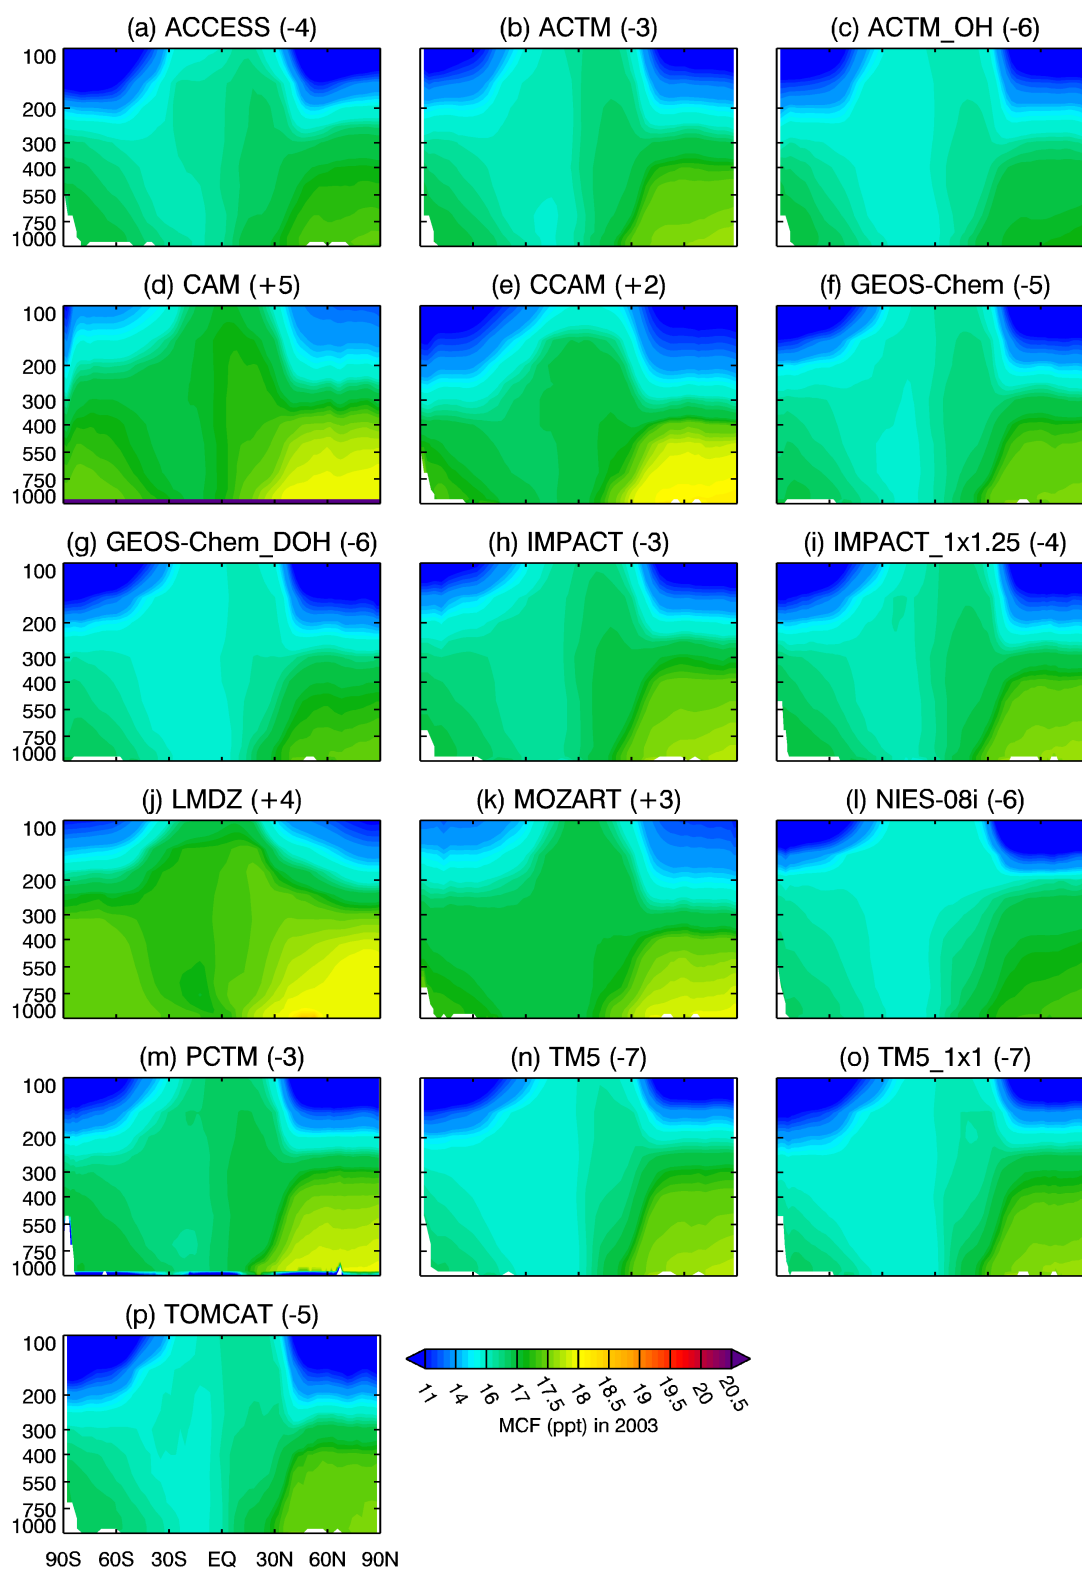

**Figure S17:** Latitude-pressure CH<sub>3</sub>CCl<sub>3</sub> distribution along the 180°E longitude for the averages during DJF months of the year 2003-2004. Note the unequal colour bar.

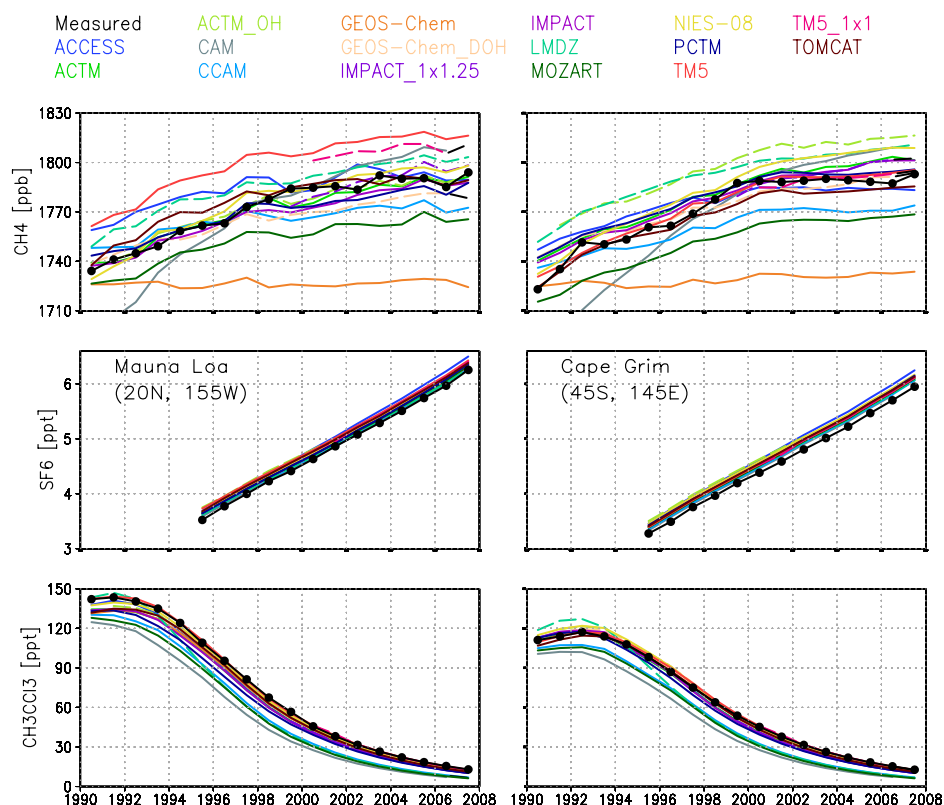

**Figure S18:** Annual mean timeseries at MLO and CGO suggesting that all models started with relatively similar initial conditions for CH<sub>4</sub>, but drifted away with time depending on the model behaviour. Fig. S19 shows the simulated time series integrated for the whole troposphere at monthly time intervals.

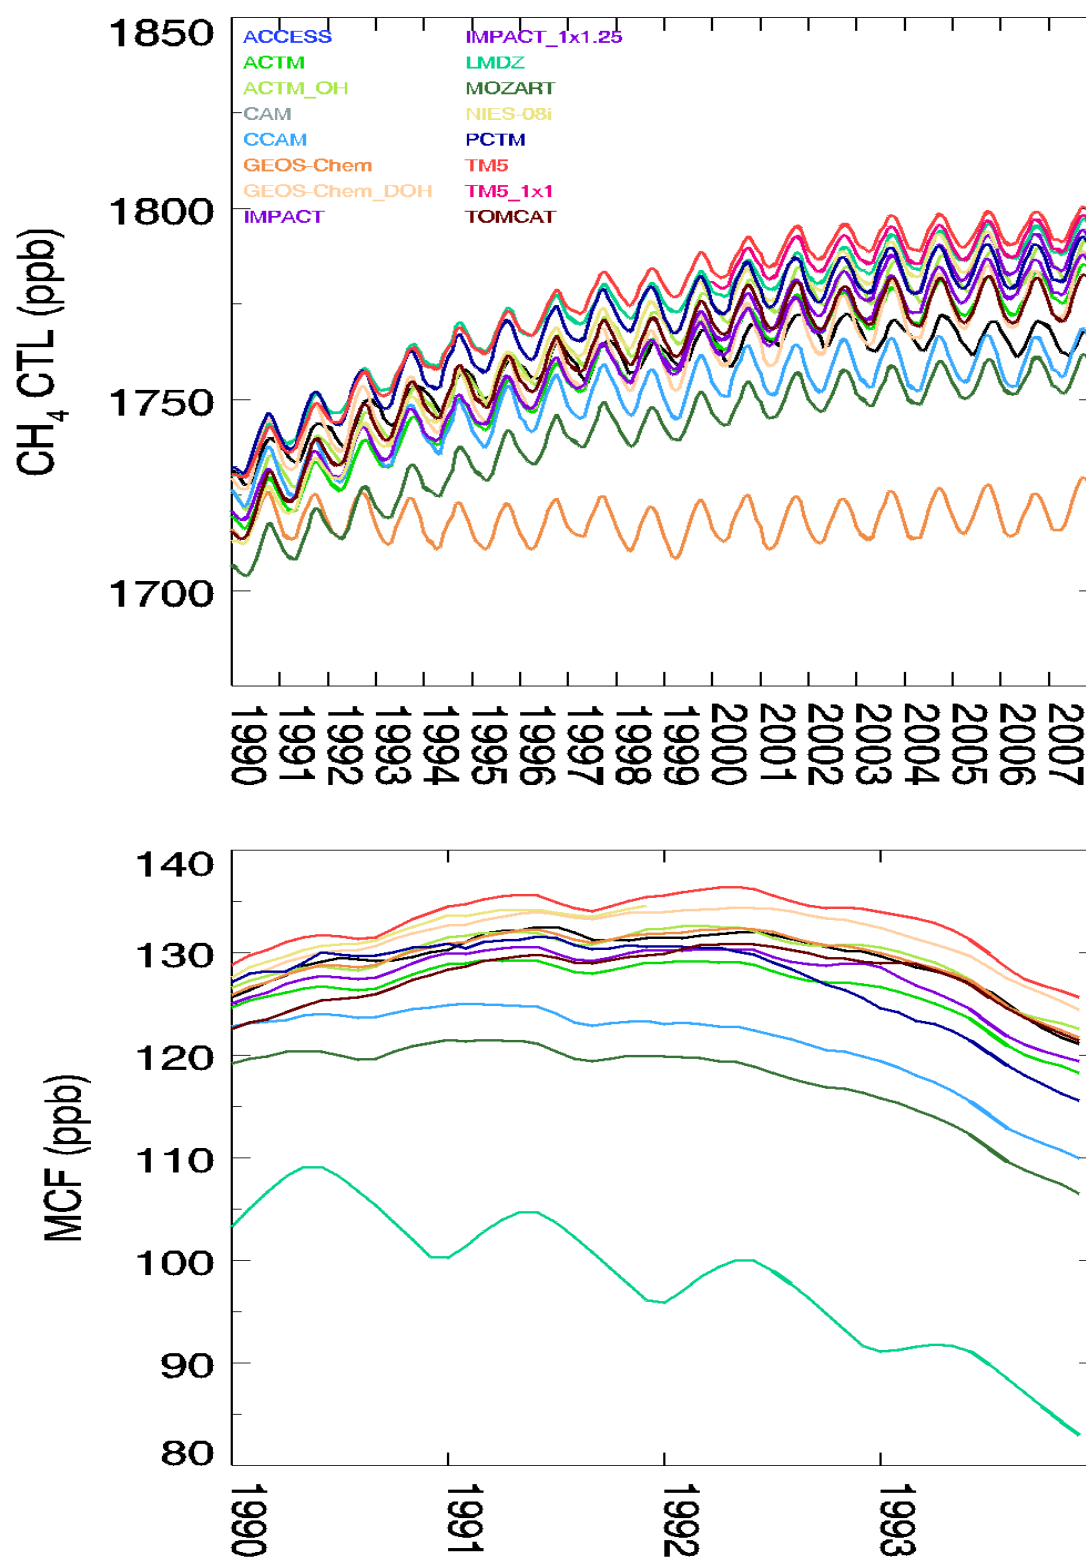

**Figure S19:** Monthly-mean model values integrated for the troposphere (850-200 mb) for CH<sub>4</sub>\_CTL (top) and CH<sub>3</sub>CCl<sub>3</sub> (bottom). This is also to show that the initial values of model played relatively minor role for the CH<sub>4</sub> and CH<sub>3</sub>CCl<sub>3</sub> model-to-model differences. Note the model spread increased significantly from 1990 to 1993 for CH<sub>3</sub>CCl<sub>3</sub> or to the end of the simulation for CH<sub>4</sub>.

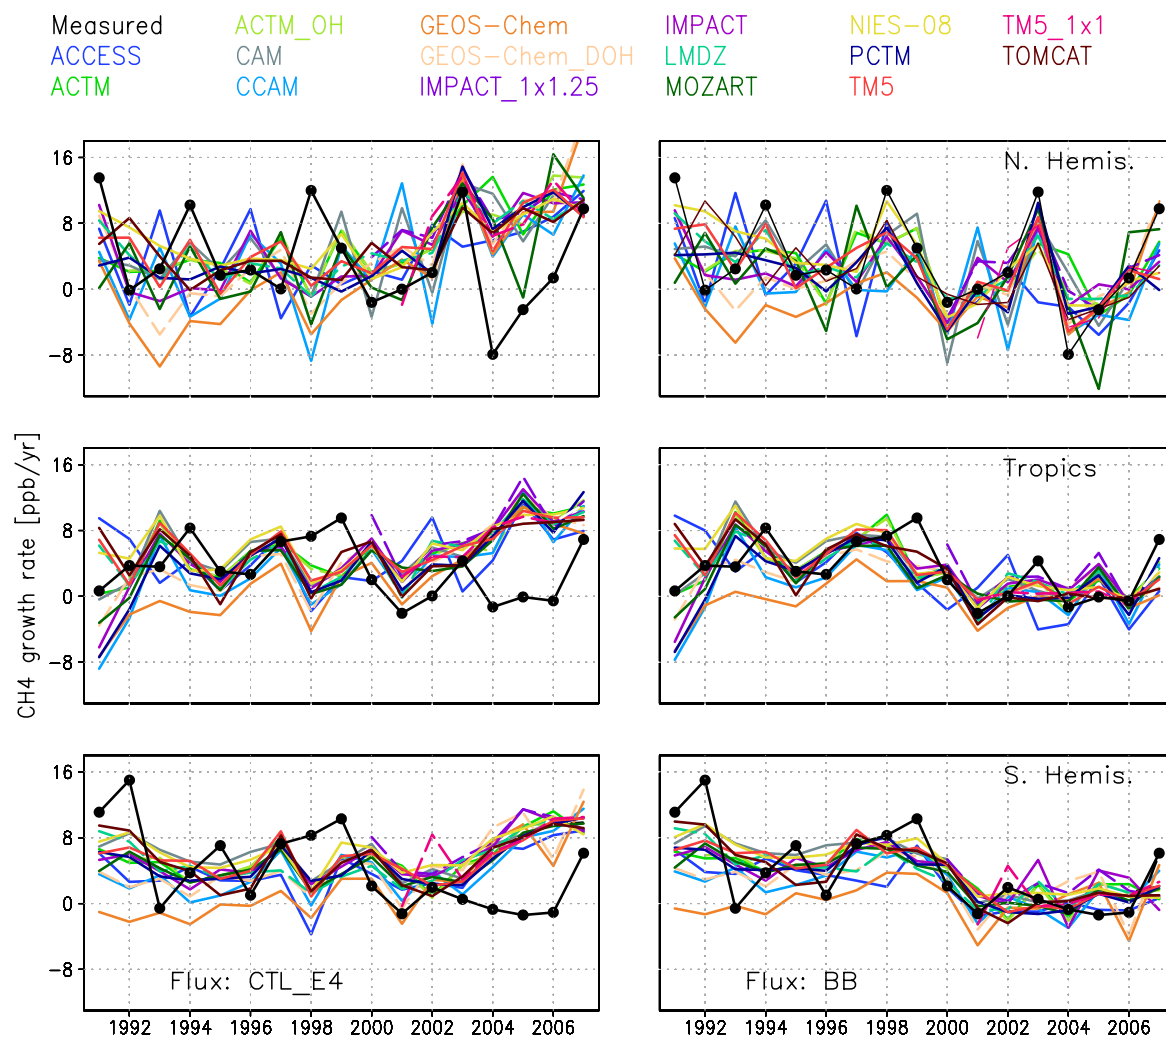

**Figure S20:** Same as Figure 6, but for CH<sub>4</sub>\_CTL\_E4 (left column) and CH<sub>4</sub>\_BB (right column) tracers.

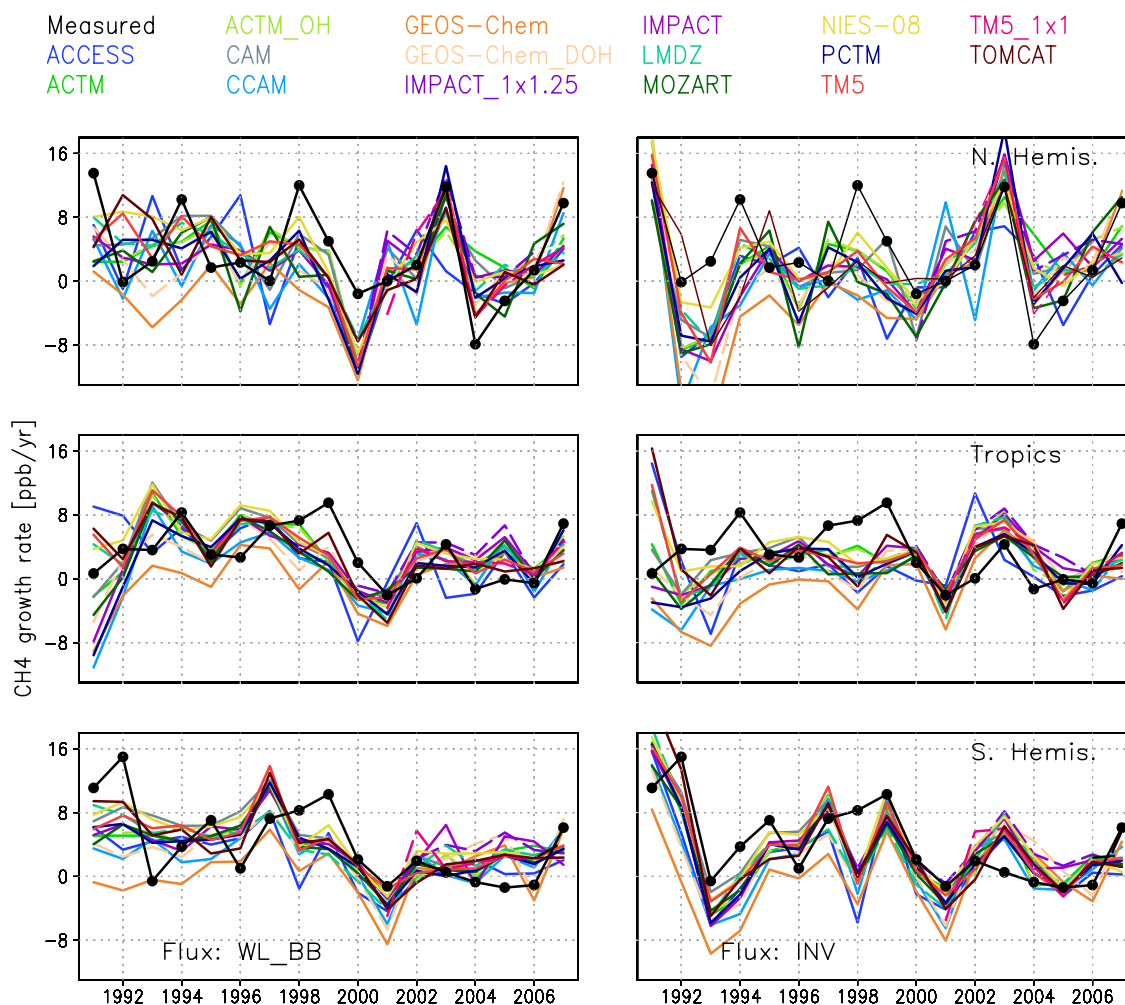

**Figure S21:** Same as Figure 6, but for CH<sub>4</sub>\_WL\_BB (left column) and CH<sub>4</sub>\_INV (right column) tracers.

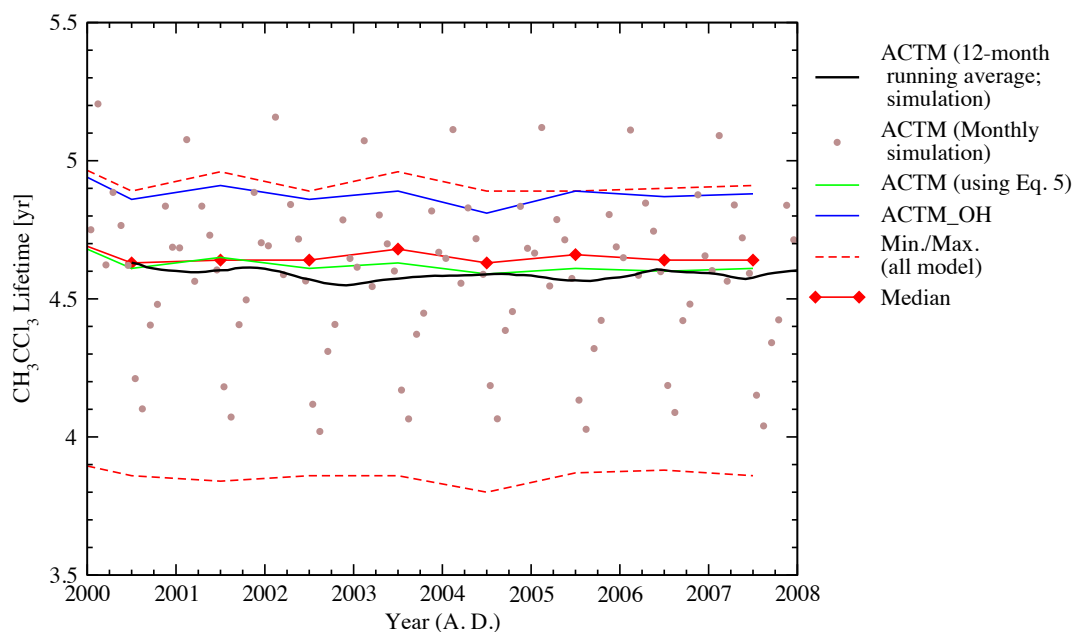

**Figure S22:** Comparison of CH<sub>3</sub>CCl<sub>3</sub> lifetimes calculated using ACTM photochemical loss rate at each model grid (black line; symbols) and Eqn. 5 of the main text for ACTMs (green & blue lines). The median and range of all models are also shown for a reference (red lines). The average lifetimes over the 2000-2007 period using Eq. 5 and aggregating grided ACTM loss rates are 4.60 and 4.59, respectively.
